# Supplementary material
Source: publisher figshare collection journal article supplement (https://acs.figshare.com/ndownloader/files/3974002)
Supplement: Supplementary file 1 [file 3974002]

## Supporting Information

### Anaerobic Nitroxide-Catalyzed Oxidation of Alcohols Using the $\text{NO}^+/\text{NO}^\bullet$ Redox Pair

Martin Holan, Ullrich Jahn\*

*Institute of Organic Chemistry and Biochemistry, Academy of Sciences of the Czech Republic, Flemingovo náměstí 2, 166 10 Prague 6, Czech Republic; e-mail: jahn@uochb.cas.cz*

#### Table of contents:

|                                                                          |     |
|--------------------------------------------------------------------------|-----|
| General reaction procedures, analytical data of compounds                | S1  |
| Copies of $^1\text{H}$ , $^{19}\text{F}$ and $^{13}\text{C}$ NMR spectra | S14 |
| References                                                               | S39 |

**General:** All reactions were conducted in oven-dried glassware under a nitrogen atmosphere. Diethyl ether was dried over Na/benzophenone and dichloromethane over  $\text{CaH}_2$ , respectively, under an argon atmosphere. Methanol and hexane were distilled from  $\text{Mg/I}_2$  and  $\text{P}_2\text{O}_5$  respectively prior to use.  $\text{BF}_3\cdot\text{OEt}_2$  and a  $\text{LiBF}_4$  solution (1M in  $\text{CH}_3\text{CN}$ ) were used as received. Silica gel on TLC-PET foils with fluorescent indicator 254 nm (Sigma-Aldrich) or an Agilent 6850 Series GC System with FID were used for monitoring reactions. Flash column chromatographic separations were performed on silica gel 60 (Fluka, 230-400 mesh). HPLC analysis was performed with a Smartline 1000 isocratic pump (Knauer) and a Smartline 2500 UV detector (Knauer) on a Chiralcel OJ-H ( $250 \times 4.6$  mm, 5  $\mu\text{m}$  particle size, Daicel) column. IR spectra were taken on a Bruker ALPHA FT-IR spectrometer as neat samples using an ATR device.  $^1\text{H}$ ,  $^{19}\text{F}$  and  $^{13}\text{C}$  NMR spectra were recorded, unless otherwise noted, in  $\text{CDCl}_3$  on a Bruker Avance 400 spectrometer at 400.1 MHz for  $^1\text{H}$  NMR, 376.3 MHz for  $^{19}\text{F}$  NMR and 100.6 MHz for  $^{13}\text{C}$  NMR, respectively. Connectivity was determined by  $^1\text{H}$ - $^1\text{H}$  COSY experiments.  $^{13}\text{C}$  NMR assignments were obtained from APT and HSQC experiments. ESI-mass spectra were obtained on a Thermo Fisher Scientific LCQ Fleet spectrometer, sample concentration approx. 1  $\mu\text{g/mL}$ , spray voltage pos. mode: 3.3 kV. CI and ESI HRMS spectra were measured on a Waters Q-ToF micro spectrometer, resolution: 100000. Combustion analyses were performed at the Microanalytical Laboratories of IOCB AS CR Prague. Melting points are uncorrected.

**Starting materials:** 6-(Triethylsilyloxy)hexan-1-ol **5l**,<sup>S1</sup> *cis*-4-(*tert*-butyl)cyclohexanol *cis*-**5m**,<sup>S2</sup> *trans*-4-(*tert*-butyl)cyclohexanol *trans*-**5m**,<sup>S2</sup> (*S*)-4-(*tert*-butyldiphenylsilyloxy)-2-methylbutanol **5p**,<sup>S3</sup> and (*S*)-*N*-(*tert*-butyloxycarbonyl)prolinol **5q**<sup>S4</sup> were prepared according to literature procedures.

**2,2,6,6-tetramethyl-*N*-oxopiperidinium tetrafluoroborate 4:**

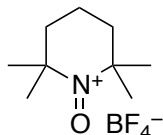

**Table 1, entries 1 and 2:** *t*-BuONO (120  $\mu$ L, 1 mmol) was added to a solution of  $\text{BF}_3 \cdot \text{OEt}_2$  (for amounts see Table 1) in dry  $\text{Et}_2\text{O}$  (4 mL) at room temperature under a nitrogen atmosphere. A solution of TEMPO **1** (156 mg, 1 mmol) in  $\text{Et}_2\text{O}$  (0.5 mL) was added and the inhomogeneous reaction mixture was stirred for 1 h. The yellow precipitate was filtered off, washed with cold  $\text{Et}_2\text{O}$  and dried in vacuum.

**Table 1, entry 3:** *t*-BuONO (180  $\mu$ L, 1.5 mmol) was added to a solution of  $\text{BF}_3 \cdot \text{OEt}_2$  (166  $\mu$ L, 1.35 mmol) in dry  $\text{CH}_2\text{Cl}_2$  (4 mL) at 0  $^\circ\text{C}$  under a nitrogen atmosphere, upon which precipitation of colorless crystals occurred. The reaction mixture was warmed to room temperature and a solution of TEMPO **1** (156 mg, 1 mmol) in  $\text{CH}_2\text{Cl}_2$  (0.5 mL) was added. The inhomogeneous reaction mixture was stirred for 3 h. The yellow precipitate that formed upon addition of  $\text{Et}_2\text{O}$  (10 mL) was filtered off, washed with cold  $\text{Et}_2\text{O}$  and dried in vacuum.

**Table 1, entry 4:**  $\text{HBF}_4$  (130  $\mu$ L, 48 wt. % in  $\text{H}_2\text{O}$ ) was added to a solution of TEMPO **1** (156 mg, 1 mmol) in dry  $\text{Et}_2\text{O}$  (4 mL). *t*-BuONO (120  $\mu$ L, 1 mmol) was added to the inhomogeneous reaction mixture at room temperature under a nitrogen atmosphere. The inhomogeneous reaction mixture was stirred for 1 h. The yellow precipitate was filtered off, washed with cold  $\text{Et}_2\text{O}$  and dried in vacuum.

**Table 1, entry 5:** *t*-BuONO (180  $\mu$ L, 1.5 mmol) was added to a solution of  $\text{LiBF}_4$  (1 mL, 1M in  $\text{CH}_3\text{CN}$ ) in dry  $\text{Et}_2\text{O}$  (4 mL) at room temperature under a nitrogen atmosphere. A solution of TEMPO **1** (156 mg, 1 mmol) in  $\text{Et}_2\text{O}$  (0.5 mL) was added and the inhomogeneous mixture was stirred overnight. The reaction mixture was cooled to  $-20\text{ }^\circ\text{C}$ , the yellow precipitate was filtered off and washed with cold  $\text{Et}_2\text{O}$ . The yellow precipitate was dissolved in  $\text{CH}_3\text{CN}$  (4 mL) and filtered through a paper filter. The solvent was evaporated,  $\text{Et}_2\text{O}$  (4 mL) was added and yellow precipitate was filtered off, washed with cold  $\text{Et}_2\text{O}$  and dried in vacuum.

For yields see Table 1. Yellow solid. m. p.  $155\text{ }^\circ\text{C}$  with decomposition. -  $\text{C}_9\text{H}_{18}\text{BF}_4\text{NO}$ : calc. C 44.47 H 7.46 N 5.76; found C 44.48 H 7.62 N 5.55.

### 6-(Triethylsilyloxy)hexan-1-ol **5l**:

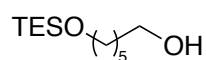

The analytical data were not previously given in the literature.<sup>S1</sup> Column chromatography (hexane/EtOAc 5:1) gave 827 mg (71%) of a colorless liquid. -  $R_f$  = 0.6, hexane/EtOAc 1:1. - IR:  $\tilde{\nu}$  = 3600-3000, 2944, 2922, 2885, 1464, 1419, 1390, 1242, 1096, 1059, 1008, 799, 726, 672  $\text{cm}^{-1}$ . - MS (+ESI)  $m/z$  (%): 255 ( $[M+Na^+]$ , 100), 233 ( $[M+H^+]$ , 3). -  $C_{12}H_{28}O_2Si$ : calc. C 62.01 H 12.14; found C 61.88 H 12.26. -  $^1H$  NMR (400 MHz):  $\delta$  = 0.53 (q,  $J$  = 7.9 Hz, 6H,  $Si(CH_2CH_3)_3$ ), 0.89 (t,  $J$  = 7.9 Hz, 9H,  $Si(CH_2CH_3)_3$ ), 1.20 (br s, 1H,  $CH_2OH$ ), 1.26-1.35 (m, 4H,  $SiOCH_2CH_2CH_2CH_2CH_2CH_2OH$ ), 1.45-1.55 (m, 4H,  $SiOCH_2CH_2CH_2CH_2CH_2CH_2OH$ ), 3.54 (t,  $J$  = 6.7 Hz, 2H,  $SiOCH_2CH_2$ ), 3.58 (br t,  $J$  = 6.0 Hz, 2H,  $CH_2CH_2OH$ ). -  $^{13}C$  NMR (100 MHz):  $\delta$  = 4.6 (t,  $Si(CH_2CH_3)_3$ ), 6.9 (q,  $Si(CH_2CH_3)_3$ ), 25.7, 25.8 (t,  $SiOCH_2CH_2CH_2CH_2CH_2CH_2OH$ ), 32.95, 33.00 (t,  $SiOCH_2CH_2CH_2CH_2CH_2CH_2OH$ ), 63.0, 63.2 (t,  $SiOCH_2CH_2CH_2CH_2CH_2CH_2OH$ ).

### Oxidation of benzyl alcohol in the presence of TEMPO (Optimization procedure):

$BF_3 \cdot OEt_2$  (for amounts see Table 2) and  $t\text{-BuONO}$  (476  $\mu\text{L}$ , 4 mmol) were added subsequently to a solution of **5a** (2 mmol) in dry  $CH_2Cl_2$  (10 mL) at room temperature under a nitrogen atmosphere. After heating to reflux a solution of **1** (for amounts see Table 2) in  $CH_2Cl_2$  (0.2 mL) was added. After stirring for the appropriate time (see Table 2) at reflux the pale yellow reaction mixture was diluted with diethyl ether (10 mL). The yellow precipitate of **4** that formed, was removed by filtration through a plug of silica gel. The solvent was evaporated and the resulting pale orange mixture was purified by column chromatography to give benzaldehyde **6a** (for yields see Table 2).

**Note:** The formation of NO was proven upon exposure to air, because red vapors of  $NO_2$  formed.

### Benzaldehyde **6a**:

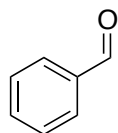

Purification by column chromatography (pentane/Et<sub>2</sub>O 20:1) as a colorless liquid. For yields see Table 2. The NMR data corresponded to those reported in the literature.<sup>S5</sup>

**Oxidation of benzyl alcohol in the absence of TEMPO:**  $\text{BF}_3 \cdot \text{OEt}_2$  (17  $\mu\text{L}$ , 0.135 mmol) and *t*-BuONO (476  $\mu\text{L}$ , 4 mmol) were added subsequently to a solution of **5a** (2 mmol) in dry  $\text{CH}_2\text{Cl}_2$  (10 mL) at room temperature under a nitrogen atmosphere. After heating to reflux for 5.5 h the solvent was evaporated and the resulting yellow mixture was purified by column chromatography (pentane/ $\text{Et}_2\text{O}$  20:1) to give 156 mg (73%) of benzaldehyde **6a**. The mechanism of this oxidation is different from the TEMPO-catalyzed oxidation, since the nitrosonium ion acts as direct oxidant as reported in the literature<sup>S6</sup> and no formation of  $\text{NO}_2$  was observed upon exposure to air.

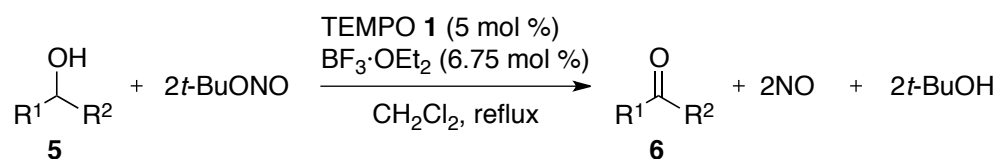

**Oxidation of aromatic and allylic alcohols (General procedure):**  $\text{BF}_3 \cdot \text{OEt}_2$  (17  $\mu\text{L}$ , 0.135 mmol) and *t*-BuONO (715  $\mu\text{L}$ , 6 mmol) were added subsequently to a solution of **5** (2 mmol) in dry  $\text{CH}_2\text{Cl}_2$  (10 mL) at room temperature under a nitrogen atmosphere. After heating to reflux a solution of **1** (16 mg, 0.1 mmol) in  $\text{CH}_2\text{Cl}_2$  (0.2 mL) was added. After stirring for the appropriate time (see Scheme 1) at reflux the pale yellow reaction mixture was diluted with diethyl ether (10 mL). The yellow precipitate of **4** that formed was removed by filtration through a plug of silica gel. The solvent was evaporated and the resulting pale orange mixture was purified by column chromatography.

**Note:** Deviations from the standard procedure are described at the individual compounds.

#### Acetophenone **6b**:

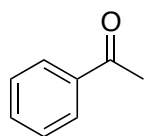

Column chromatography (pentane/ $\text{Et}_2\text{O}$  20:1) gave 193 mg (80%) of a colorless liquid. The NMR data corresponded to those reported in the literature.<sup>S7</sup>

***p*-Nitrobenzaldehyde 6c:**

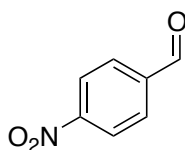

Column chromatography (pentane/Et<sub>2</sub>O 5:1) gave 264 mg (87%) of colorless crystals. m. p. 106-107 °C; (lit.: 106-107 °C).<sup>S8</sup> The NMR data corresponded to those reported in the literature.<sup>S9</sup>

***p*-Methoxybenzaldehyde 6d:**

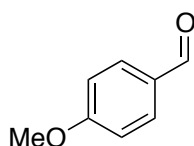

Column chromatography (pentane/Et<sub>2</sub>O 5:1) gave 275 mg (99%) of a colorless liquid. The NMR data corresponded to those reported in the literature.<sup>S10</sup>

***p*-Cyanobenzaldehyde 6e:**

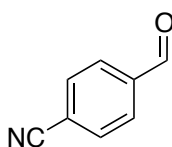

Column chromatography (pentane/Et<sub>2</sub>O 2:1) gave 222 mg (87%) of colorless crystals. m. p. 100-101 °C; (lit.: 99-100 °C).<sup>S11</sup> The NMR data corresponded to those reported in the literature.<sup>S12</sup>

***trans*-Cinnamaldehyde 6f:**

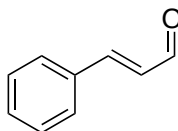

Prepared from cinnamyl alcohol **5f** (402 mg, 3 mmol). Column chromatography (pentane/Et<sub>2</sub>O 5:1) gave 350 mg (88%) of a colorless liquid. The NMR data corresponded to those reported in the literature.<sup>S13</sup>

***trans,trans*-Deca-2,4-dienal **6g**:**

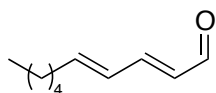

LiBF<sub>4</sub> was used instead of BF<sub>3</sub>•OEt<sub>2</sub> and the order of addition of the reaction components was changed as follows. *t*-BuONO (360 μL, 3 mmol) and a solution of **1** (8 mg, 0.05 mmol) in CH<sub>2</sub>Cl<sub>2</sub> (0.2 mL) were added subsequently to a solution of LiBF<sub>4</sub> (50 μL, 5 mol %, 1M in CH<sub>3</sub>CN) in dry CH<sub>2</sub>Cl<sub>2</sub> (5 mL) at room temperature under a nitrogen atmosphere. After heating to reflux, **5g** (154 mg, 1 mmol) was added as the last component to the reaction mixture. After stirring at reflux for 3 h the reaction mixture was diluted with diethyl ether (5 mL) and the precipitate of **4** was removed by filtration through a plug of silica gel. The solvent was evaporated and the resulting mixture was purified by column chromatography (pentane/Et<sub>2</sub>O 10:1) to give 92 mg (60%) of a colorless liquid. The NMR data corresponded to those reported in the literature.<sup>S14</sup>

**Oxidation of aliphatic alcohols (General procedure):** BF<sub>3</sub>•OEt<sub>2</sub> (12 μL, 0.1 mmol) and *t*-BuONO (715 μL, 6 mmol) were added subsequently to a solution of **5** (2 mmol) in dry CH<sub>2</sub>Cl<sub>2</sub> (10 mL) at room temperature under a nitrogen atmosphere. After heating to reflux a solution of **1** (16 mg, 0.1 mmol) in CH<sub>2</sub>Cl<sub>2</sub> (0.2 mL) was added. After 1 h another portion of **1** (16 mg, 0.1 mmol) in CH<sub>2</sub>Cl<sub>2</sub> (0.2 mL) was added. After stirring for the appropriate time (see Scheme 3) at reflux the pale yellow reaction mixture was diluted with diethyl ether (10 mL). The yellow precipitate of **4** that formed, was removed by filtration through a plug of silica gel. The solvent was evaporated and the resulting pale orange mixture was purified by column chromatography.

**Note:** Deviations from the standard procedure are described at the individual compounds.

**Dodecanal **6h**:**

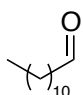

Prepared from dodecanol **5h** (186 mg, 1 mmol). Column chromatography (pentane/Et<sub>2</sub>O 40:1 gradient to 20:1) gave 154 mg (83%) of a colorless wax. The NMR data corresponded to those reported in the literature.<sup>S15</sup>

### 3-Phenylpropanal 6i:

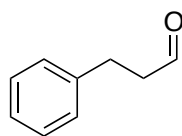

Column chromatography (pentane/Et<sub>2</sub>O 20:1 gradient to 10:1) gave 234 mg (87%) of a colorless liquid. The NMR data corresponded to those reported in the literature.<sup>S16</sup>

### 4-Phenylbutan-2-one 6j:

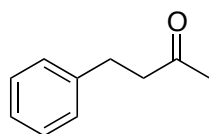

Column chromatography (pentane/Et<sub>2</sub>O 20:1 gradient to 10:1) gave 263 mg (88%) of a colorless liquid. The NMR data corresponded to those reported in the literature.<sup>S17</sup>

### Hex-5-ynal 6k:

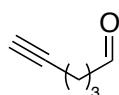

Column chromatography (pentane/Et<sub>2</sub>O 10:1) gave 133 mg (69%) of a pale orange liquid. The NMR data corresponded to those reported in the literature.<sup>S18</sup>

### 6-(Triethylsilyloxy)hexanal 6l:

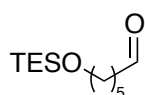

LiBF<sub>4</sub> was used instead of BF<sub>3</sub>•OEt<sub>2</sub> and the order of addition of the reaction components was changed as follows. *t*-BuONO (360 μL, 3 mmol) and a solution of **1** (8 mg, 0.05 mmol) in dry CH<sub>2</sub>Cl<sub>2</sub> (0.2 mL) were added subsequently to a solution of LiBF<sub>4</sub> (50 μL, 5 mol %, 1M in CH<sub>3</sub>CN) in CH<sub>2</sub>Cl<sub>2</sub> (5 mL) at room temperature under a nitrogen atmosphere. After heating to reflux, **5l** (232 mg, 1 mmol) was added as the last component to the reaction mixture. After 1 h another portion of **1** (8 mg, 0.05 mmol) in CH<sub>2</sub>Cl<sub>2</sub> (0.2 mL) was added. After stirring for 8 h at reflux the reaction mixture was diluted with diethyl ether (5 mL) and the formed precipitate of **4** was removed by filtration through a plug of silica gel. The solvent was evaporated and the resulting mixture was purified by column chromatography (pentane/Et<sub>2</sub>O 10:1) to give 168 mg (73%) of a pale orange liquid. - R<sub>f</sub> = 0.55, hexane/EtOAc

5:1. - IR:  $\tilde{\nu}$  = 2946, 2921, 2885, 2823, 2724, 1732, 1463, 1418, 1393, 1243, 1095, 1008, 727, 672  $\text{cm}^{-1}$ . - MS (+ESI)  $m/z$  (%): 483 ( $[2\text{M}+\text{Na}^+]$ , 10), 269 ( $[\text{M}+\text{K}^+]$ , 11), 253 ( $[\text{M}+\text{Na}^+]$ , 100), 231 ( $[\text{M}+\text{H}^+]$ , 9). -  $\text{C}_{12}\text{H}_{26}\text{O}_2\text{Si}$  (230.42): calc. C 62.55 H 11.37; found C 62.57 H 11.18. - HRMS (+ESI)  $m/z$  [ $\text{C}_{12}\text{H}_{26}\text{O}_2\text{SiNa}^+$ ]: calc. 253.1594; found 253.1595. -  $^1\text{H}$  NMR (400 MHz):  $\delta$  = 0.53 (q,  $J$  = 7.9 Hz, 6H,  $\text{Si}(\text{CH}_2\text{CH}_3)_3$ ), 0.89 (t,  $J$  = 7.9 Hz, 9H,  $\text{Si}(\text{CH}_2\text{CH}_3)_3$ ), 1.32 (m, 2H,  $\text{OCH}_2\text{CH}_2\text{CH}_2$ ), 1.48 (m, 2H,  $\text{OCH}_2\text{CH}_2\text{CH}_2$ ), 1.59 (quint,  $J$  = 7.4 Hz, 2H,  $\text{CH}_2\text{CH}_2\text{CHO}$ ), 2.37 (dt,  $J$  = 7.4, 1.8 Hz, 2H,  $\text{CH}_2\text{CH}_2\text{CHO}$ ), 3.54 (t,  $J$  = 6.5 Hz,  $\text{OCH}_2\text{CH}_2\text{CH}_2$ ), 9.71 (t,  $J$  = 1.8 Hz,  $\text{CH}_2\text{CH}_2\text{CHO}$ ). -  $^{13}\text{C}$  NMR (100 MHz):  $\delta$  = 4.4 (t,  $\text{Si}(\text{CH}_2\text{CH}_3)_3$ ), 6.8 (q,  $\text{Si}(\text{CH}_2\text{CH}_3)_3$ ), 22.0 (t,  $\text{OCH}_2\text{CH}_2\text{CH}_2$ ), 25.5 (t,  $\text{OCH}_2\text{CH}_2\text{CH}_2$ ), 32.6 (t,  $\text{CH}_2\text{CH}_2\text{CHO}$ ), 43.9 (t,  $\text{CH}_2\text{CH}_2\text{CHO}$ ), 62.6 (t,  $\text{OCH}_2\text{CH}_2\text{CH}_2$ ), 202.7 (d,  $\text{CH}_2\text{CH}_2\text{CHO}$ ).

#### 4-(*tert*-Butyl)cyclohexanone 6m:

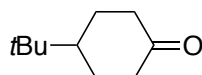

Evaporation of the crude reaction mixture gave 311 mg (99%) of a colorless solid material. m. p. 47-48  $^{\circ}\text{C}$ ; (lit.: 47-49  $^{\circ}\text{C}$ ).<sup>S19</sup> The NMR data corresponded to those reported in the literature.<sup>S20</sup>

#### 3,5-Dimethylcyclohexanone 6n:

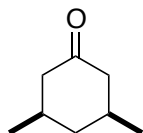

Column chromatography (pentane/ $\text{Et}_2\text{O}$  10:1) gave 190 mg (75%) of a pale orange liquid. The NMR data corresponded to those reported in the literature.<sup>S21</sup>

#### L-Menthone 6o:

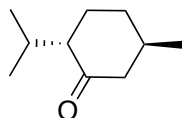

Prepared from menthol **5o** (156 mg, 1 mmol) and AZADO **2** (8 + 8 mg, 5 + 5 mol %, 0.1 mmol) instead of TEMPO **1**. Column chromatography (pentane/ $\text{Et}_2\text{O}$  10:1) gave 147 mg (95%) of a colorless liquid. The NMR data corresponded to those reported in the literature.<sup>S22</sup>



**(1*R*,2*S*,5*R*)-2-Isopropyl-5-methylcyclohexyl nitrite 7o:**

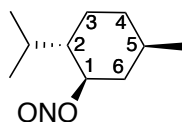

Column chromatography (pentane) gave 302 mg (81%) of a colorless liquid. -  $R_f = 0.85$ , hexane/EtOAc 5:1. - IR:  $\tilde{\nu} = 2966, 2936, 2881, 1642, 1461, 1376, 1024, 932, 883, 798, 762, 675 \text{ cm}^{-1}$ . - MS (+CI)  $m/z$  (%): 155 ( $[M-\text{NO}]^+$ , 18), 139 ( $[M-\text{HONO}+\text{H}^+]$ , 100). -  $\text{C}_{10}\text{H}_{19}\text{NO}_2$  (185.26): calc. C 64.83 H 10.34 N 7.56; found C 65.06 H 10.34 N 7.34. -  $[\alpha]_D^{20} = -37.7$  ( $c = 0.411$ , CH<sub>3</sub>OH). -  $^1\text{H}$  NMR (400 MHz):  $\delta = 0.77$  (d,  $J = 7.0$  Hz, 3H, CH(CH<sub>3</sub>)<sub>2</sub>), 0.90 (d,  $J = 7.0$  Hz, 3H, CH(CH<sub>3</sub>)<sub>2</sub>), 0.92 (m, 1H, eq.-H4), 0.96 (d,  $J = 6.5$  Hz, 3H, CHCH<sub>3</sub>), 1.19 (m, 1H, eq.-H3), 1.23 (m, 1H, eq.-H6), 1.48 (m, 1H, ax.-H2), 1.61 (m, 1H, ax.-H5), 1.75 (m, 1H, ax.-H4), 1.79 (m, 1H, ax.-H3), 1.81 (m, 1H, CH(CH<sub>3</sub>)<sub>2</sub>), 2.03 (m, 1H, ax.-H6), 5.26 (dt,  $J = 11.2, 4.5$  Hz, ax.-H1). -  $^{13}\text{C}$  NMR (100 MHz):  $\delta = 15.9$  (q, CH(CH<sub>3</sub>)<sub>2</sub>), 20.8 (q, CH(CH<sub>3</sub>)<sub>2</sub>), 22.2 (q, CHCH<sub>3</sub>), 23.7 (t, C3), 26.0 (d, CH(CH<sub>3</sub>)<sub>2</sub>), 31.9 (d, C5), 34.3 (t, C4), 42.2 (t, C6), 46.8 (d, C2), 80.1 (d, C1).

**(*S*)-4-(*tert*-Butyldiphenylsilyloxy)-2-methylbutanal 6p:**

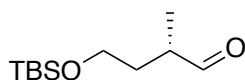

Prepared from (*S*)-4-(*tert*-butyldiphenylsilyloxy)-2-methylbutanol **5p** (82 mg, 0.24 mmol). Evaporation of the crude reaction mixture gave 80 mg (98%) of a colorless oil. The NMR data corresponded to those reported in the literature.<sup>S23</sup> -  $[\alpha]_D^{20} = +10.1$  ( $c = 1.000$ , CHCl<sub>3</sub>); (lit.:  $[\alpha]_D^{28} = +8.9$  ( $c = 1.000$ , CHCl<sub>3</sub>)<sup>S23</sup>).

Apart from comparison of the optical rotation values, the integrity of the stereogenic center was confirmed by subsequent reduction<sup>S24</sup> and transformation to Mosher ester **S1** (Scheme S1).

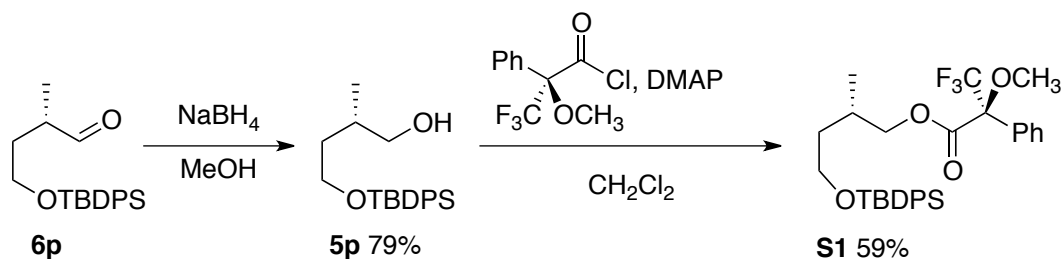

**Scheme S1.** Transformation of **6p** to Mosher ester **S1**.

**Reduction of 6p:** NaBH<sub>4</sub> (10 mg, 0.277 mmol) was added to a stirred solution of **6p** (59 mg, 0.173 mmol) in methanol (1.5 mL). The reaction mixture was stirred at room temperature for 15 min, diluted with ethyl acetate (10 mL) and washed with water (3 × 10 mL). The aqueous layer was washed with ethyl acetate (2 × 10 mL) and the combined organic fractions were dried over anhydrous MgSO<sub>4</sub>. The solvent was evaporated, the inhomogeneous residue was preadsorbed on silica gel and purified by column chromatography (hexane/EtOAc 5:1) to give 47 mg (79%) of **5p** as a colorless oil. The NMR data corresponded to those reported in the literature.<sup>S24</sup> Reduced **5p**:  $[\alpha]_{\text{D}}^{20} = -6.4$  ( $c = 1.000$ , CHCl<sub>3</sub>); starting **5p**:  $[\alpha]_{\text{D}}^{20} = -6.5$  ( $c = 1.013$ , CHCl<sub>3</sub>); (lit.:  $[\alpha]_{\text{D}}^{20} = -7.1$  ( $c = 1.000$ , CHCl<sub>3</sub>)<sup>S24</sup>).

**Mosher ester S1:** DMF (8 μL) and oxalyl chloride (100 μL, 1 mmol) were added subsequently to a stirred solution of Mosher's acid (*S*)-(-)-MTPA (24 mg, 0.1 mmol) in hexane (5 mL). The reaction mixture was stirred at room temperature for 2 h, during which a white precipitate formed. The reaction mixture was filtered through glass wool and the solvent was removed under high vacuum. The crude acid chloride was dissolved in CH<sub>2</sub>Cl<sub>2</sub> (1 mL), DMAP (24 mg, 0.2 mmol) was added, followed by **5p** (19 mg, 0.055 mmol) in CH<sub>2</sub>Cl<sub>2</sub> (1 mL) obtained above. The reaction mixture was stirred at room temperature overnight, quenched with saturated NH<sub>4</sub>Cl solution (5 mL), diluted with diethyl ether (40 mL), washed with saturated NaHCO<sub>3</sub> solution (5 × 5 mL) and brine (5 mL) and dried over anhydrous MgSO<sub>4</sub>. The solvent was evaporated to give 25 mg of a mixture of **S1** (59%) and recovered **5p** (37%). The comparison of NMR data of **S1** with those reported in the literature revealed a negligible amount of epimerization.<sup>S25</sup>

**(*S*)-*N*-(*tert*-Butyloxycarbonyl)prolinal 6q:**

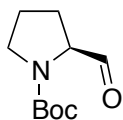

Prepared from (*S*)-*N*-(*tert*-butyloxycarbonyl)prolinol **5q** (101 mg, 0.5 mmol). Column chromatography (hexane/EtOAc 5:1) gave 40 mg (40%) of a colorless oil. The use of LiBF<sub>4</sub> instead of BF<sub>3</sub>•OEt<sub>2</sub> did not lead to an improvement, **6q** was isolated in 42% yield. The NMR data corresponded to those reported in the literature.<sup>S26</sup> -  $[\alpha]_{\text{D}}^{20} = -84.7$  ( $c = 0.660$ , CHCl<sub>3</sub>); (lit.:  $[\alpha]_{\text{D}}^{25} = -99.5$  ( $c = 0.660$ , CHCl<sub>3</sub>)<sup>S27</sup>).

Apart from comparison of the optical rotation values, the integrity of the stereogenic center was confirmed by subsequent reduction and transformation to benzoate **S2** (Scheme S2).

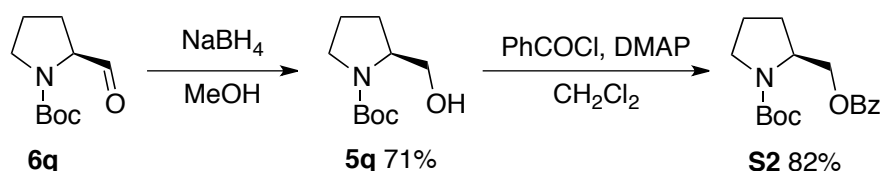

**Scheme S2.** Transformation of **6q** to benzoate **S2**.

**Reduction of 6q:** The procedure for reduction of **6q** was identical to that used for reduction of **6p**. Column chromatography (hexane/EtOAc 2:1) gave 30 mg (71%) of **5q** as a colorless oil. The NMR data corresponded to those reported in the literature.<sup>S28</sup> Reduced **5q**:  $[\alpha]_{\text{D}}^{20} = -45.9$  ( $c = 1.019$ , CH<sub>3</sub>OH); starting **5q**:  $[\alpha]_{\text{D}}^{20} = -53.4$  ( $c = 1.000$ , CH<sub>3</sub>OH); (lit.:  $[\alpha]_{\text{D}}^{25} = -45.7$  ( $c = 1.000$  g/100 ml, CH<sub>3</sub>OH)<sup>S28b</sup>).

**Benzoate S2:** DMAP (24 mg, 0.2 mmol) and a solution of **5q** (8 mg, 0.04 mmol) in CH<sub>2</sub>Cl<sub>2</sub> (1 mL) obtained above were added subsequently to a stirred solution of benzoyl chloride (12  $\mu$ L, 0.1 mmol) in CH<sub>2</sub>Cl<sub>2</sub> (1 mL). The reaction mixture was stirred at room temperature overnight, quenched with saturated NH<sub>4</sub>Cl solution (5 mL), diluted with diethyl ether (40 mL), washed with saturated NaHCO<sub>3</sub> solution (5  $\times$  5 mL) and brine (5 mL) and dried over anhydrous MgSO<sub>4</sub>. The solvent was evaporated, the inhomogeneous residue was preadsorbed on silica gel and purified by column chromatography (pentane/Et<sub>2</sub>O 5:1) to give 10 mg (82%) of **S2** as a colorless oil. The NMR data corresponded to those reported in the literature.<sup>S29</sup> The HPLC trace (Chiralcel OJ-H, heptane/*i*PrOH 39:1, 0.5 mL/min, 254 nm) showed only one peak at 15.2 min corresponding to (*S*)-*tert*-butyl 2-(benzoyloxymethyl)pyrrolidine-1-carboxylate **S2**. Previously reported conditions (Chiralcel OJ, hexane/*i*PrOH 39:1, 0.5 mL/min) gave retention times of 15.4 min for the (*S*)-enantiomer of **S2** and 17.0 min for the (*R*)-enantiomer of **S2**.<sup>S29</sup>

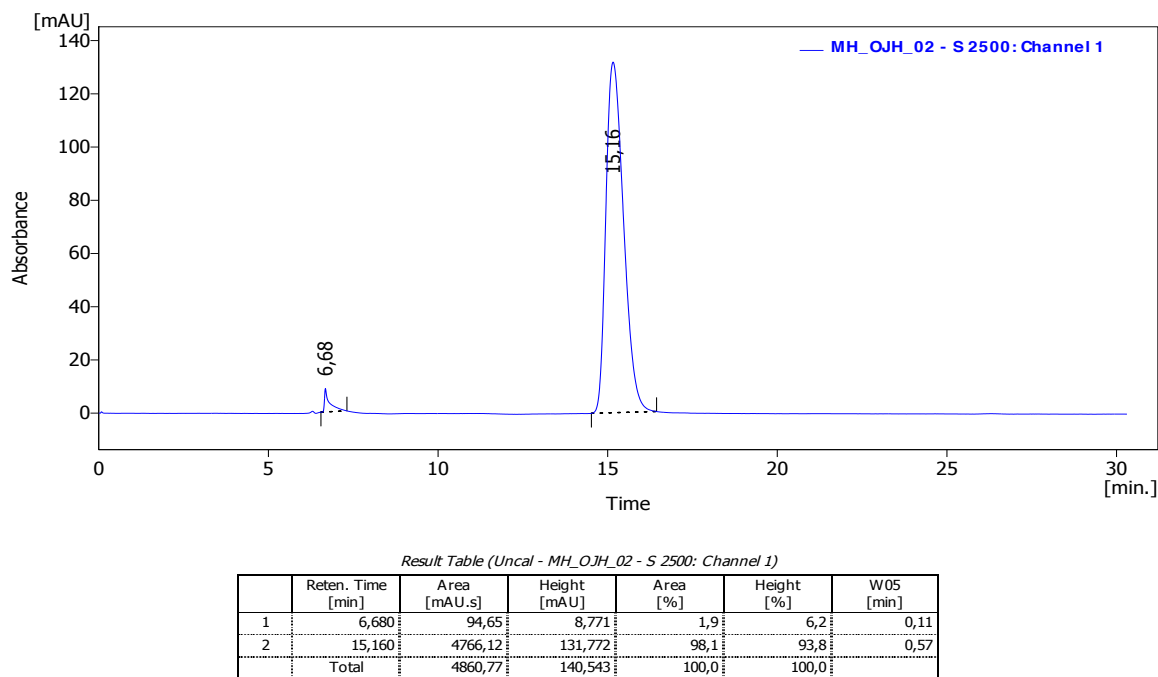

**Figure S1.** HPLC trace of (*S*)-*tert*-butyl 2-(benzyloxymethyl)pyrrolidine-1-carboxylate **S2**.

**(*S*)-*N*-(*tert*-Butyloxycarbonyl)phenylalaninal **6r**:**

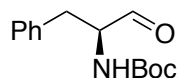

Column chromatography (hexane/EtOAc 2:1 gradient to 1:1) gave 137 mg (27%) of **6r** as a colorless oil accompanied by 79 mg (14%) of (*S*)-*N*-(*tert*-butyloxycarbonyl)-*N*-nitrosophenylalaninal **7r** as a yellow oil. The NMR data corresponded to those reported in the literature.<sup>S30</sup> The integrity of the stereogenic center was confirmed by subsequent reduction and transformation to Mosher ester **S3** (Scheme S3). CAUTION: *N*-Nitrosamines such as **7r** are potentially carcinogenic and proper care must be taken, when working with them.

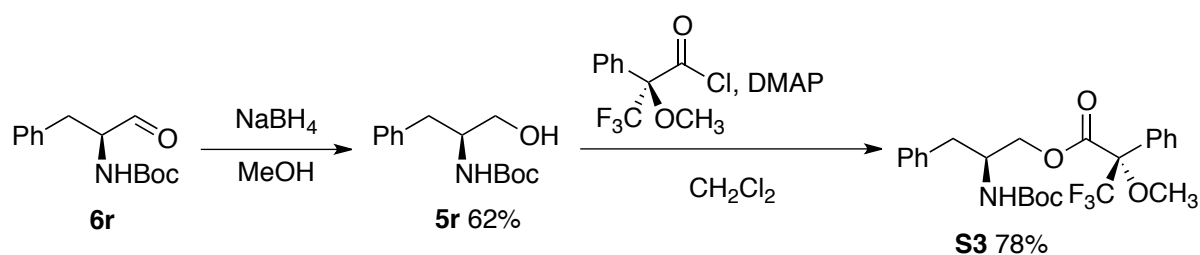

**Scheme S3.** Transformation of **6r** to Mosher ester **S3**.

**Reduction of 6r:** The procedure for reduction of **6r** was identical to that used for reduction of **6p**. Column chromatography (hexane/EtOAc 2:1) gave 78 mg (62%) of **5r** as a colorless

solid. m. p. 90-92 °C; (lit.: 91-92 °C).<sup>S31</sup> The NMR data corresponded to those reported in the literature.<sup>S32</sup> Reduced **5r**:  $[\alpha]_D^{20} = -18.1$  ( $c = 1.000$ ,  $\text{CHCl}_3$ ); starting **5r**:  $[\alpha]_D^{20} = -33.4$  ( $c = 0.996$ ,  $\text{CHCl}_3$ ); (lit.:  $[\alpha]_D^{20} = -22.0$  ( $c = 1.000$ ,  $\text{CHCl}_3$ )<sup>S32</sup>).

**Mosher ester S3**: DMF (8  $\mu\text{L}$ ) and oxalyl chloride (100  $\mu\text{L}$ , 1 mmol) were added subsequently to a stirred solution of Mosher's acid (*S*)-(-)-MTPA (24 mg, 0.1 mmol) in hexane (5 mL). The reaction mixture was stirred at room temperature for 2 h, during which a white precipitate formed. The reaction mixture was filtered through glass wool and the solvent was removed under high vacuum. The crude acid chloride was dissolved in  $\text{CH}_2\text{Cl}_2$  (1 mL), DMAP (24 mg, 0.2 mmol) was added, followed by **5r** (23 mg, 0.09 mmol) in  $\text{CH}_2\text{Cl}_2$  (1 mL) obtained above. The reaction mixture was stirred at room temperature overnight, quenched with saturated  $\text{NH}_4\text{Cl}$  solution (5 mL), diluted with diethyl ether (40 mL), washed with saturated  $\text{NaHCO}_3$  solution ( $5 \times 5$  mL) and brine (5 mL) and dried over anhydrous  $\text{MgSO}_4$ . The solvent was evaporated to give 38 mg of a mixture of **S3** (78%) and recovered **5r** (21%). The comparison of NMR data of **S3** with those reported in the literature revealed a negligible amount of epimerization.<sup>S33</sup>

**(*S*)-*N*-(*tert*-Butyloxycarbonyl)-*N*-nitrosophenylalaninal **7r**:**

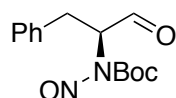

Prepared from **5r** (125 mg, 0.5 mmol) and *t*-BuONO (600  $\mu\text{L}$ , 5 mmol) under reflux for 24 h. Column chromatography (hexane/EtOAc 10:1 gradient to 5:1) gave 66 mg (47%) of **7r** as a yellow oil accompanied by 18 mg (14%) of **6r** as a colorless oil. CAUTION: *N*-Nitrosamines are potentially carcinogenic and proper care must be taken, when working with them. -  $R_f = 0.65$ , hexane/EtOAc 2:1. - IR:  $\tilde{\nu} = 2991, 2944, 2832, 2725, 1746, 1604, 1528, 1502, 1461, 1373, 1297, 1258, 1144, 1090, 1051, 967, 843, 767, 734, 702 \text{ cm}^{-1}$ . -  $\text{C}_{14}\text{H}_{18}\text{N}_2\text{O}_4$  (278.30): calc. C 60.42 H 6.52 N 10.07; found C 60.40 H 6.59 N 9.92. -  $[\alpha]_D^{20} = -44.3$  ( $c = 0.467$ ,  $\text{CH}_3\text{OH}$ ). -  $^1\text{H}$  NMR (400 MHz):  $\delta = 1.48$  (s, 9H,  $\text{C}(\text{CH}_3)_3$ ), 2.36 (dd,  $J = 14.2, 5.5$  Hz, 1H,  $\text{CH}_2\text{Ph}$ ), 2.87 (dd,  $J = 14.2, 9.7$  Hz, 1H,  $\text{CH}_2\text{Ph}$ ), 5.10 (dd,  $J = 9.7, 5.5$  Hz, 1H,  $\text{CHCHO}$ ), 7.00 (m, 2H, *o*-Ph), 7.20 (m, 3H, Ph), 9.27 (s, 1H,  $\text{CHO}$ ). -  $^{13}\text{C}$  NMR (100 MHz):  $\delta = 28.0$  (q,  $\text{C}(\text{CH}_3)_3$ ), 32.5 (t,  $\text{CH}_2\text{Ph}$ ), 61.3 (d,  $\text{CHCHO}$ ), 86.7 (s,  $\text{C}(\text{CH}_3)_3$ ), 127.2 (d, *p*-Ph), 128.8 (d, Ph), 129.2 (d, Ph), 135.8 (s, *ipso*-Ph), 151.3 (s, CON), 193.8 (d, CHO). Mass spectra could not be obtained under any conditions.

Copies of  $^1\text{H}$ ,  $^{19}\text{F}$  and  $^{13}\text{C}$  NMR spectra

6-(Triethylsilyloxy)hexan-1-ol 5l:

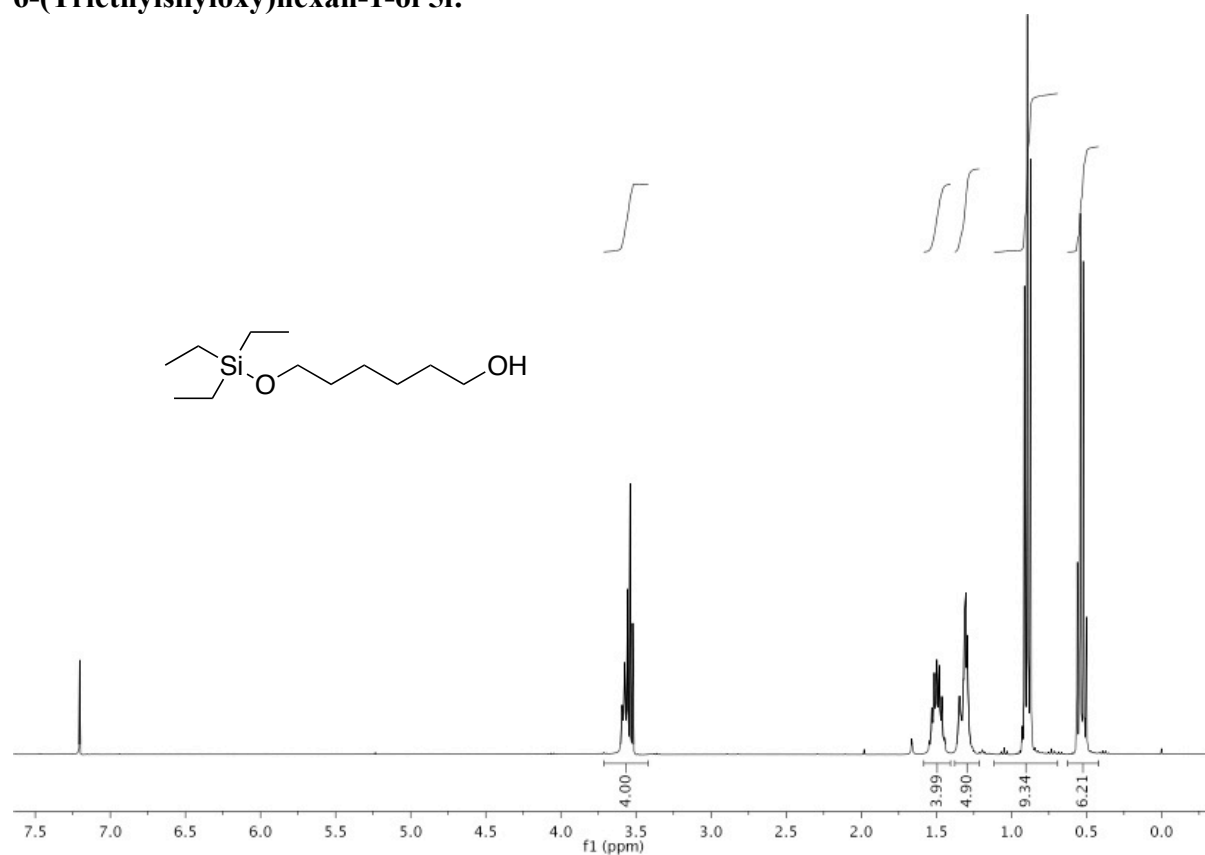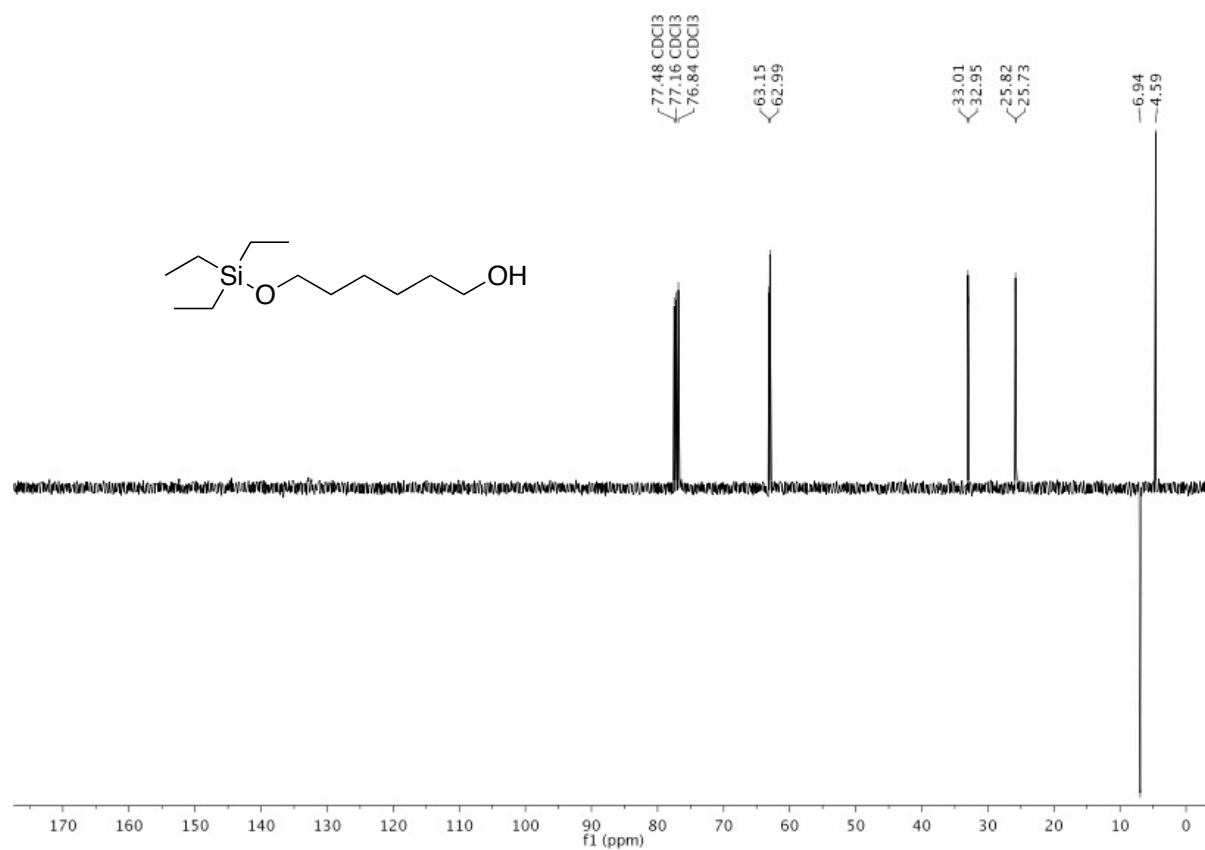

**Benzaldehyde 6a:**

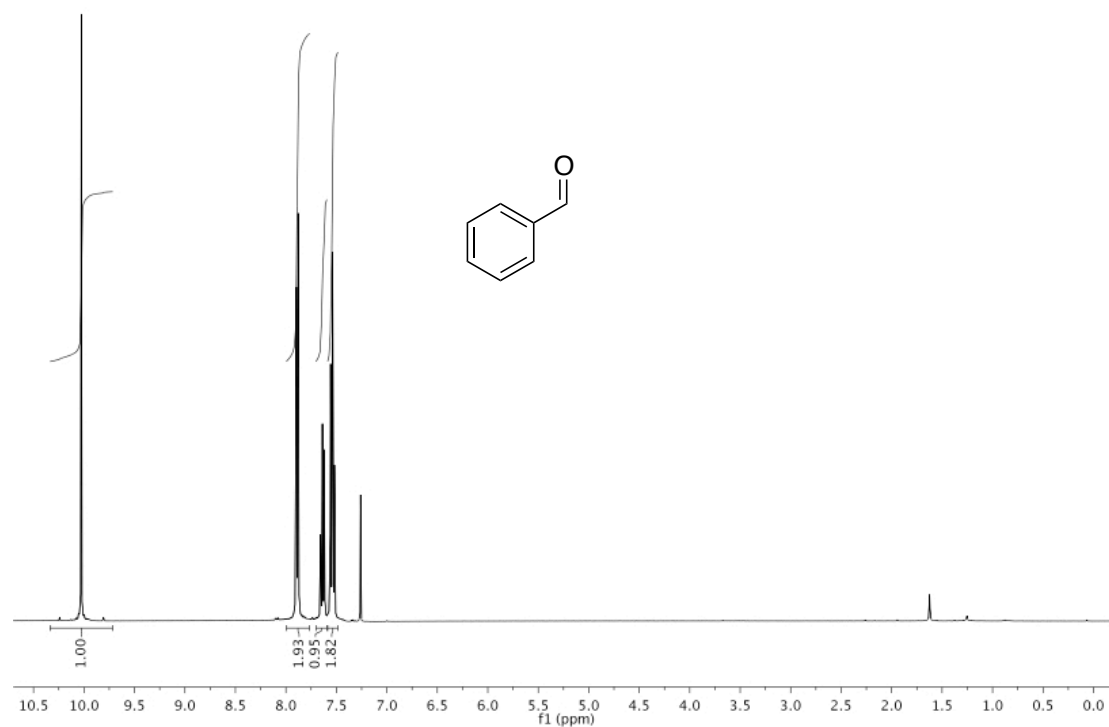

**Acetophenone 6b:**

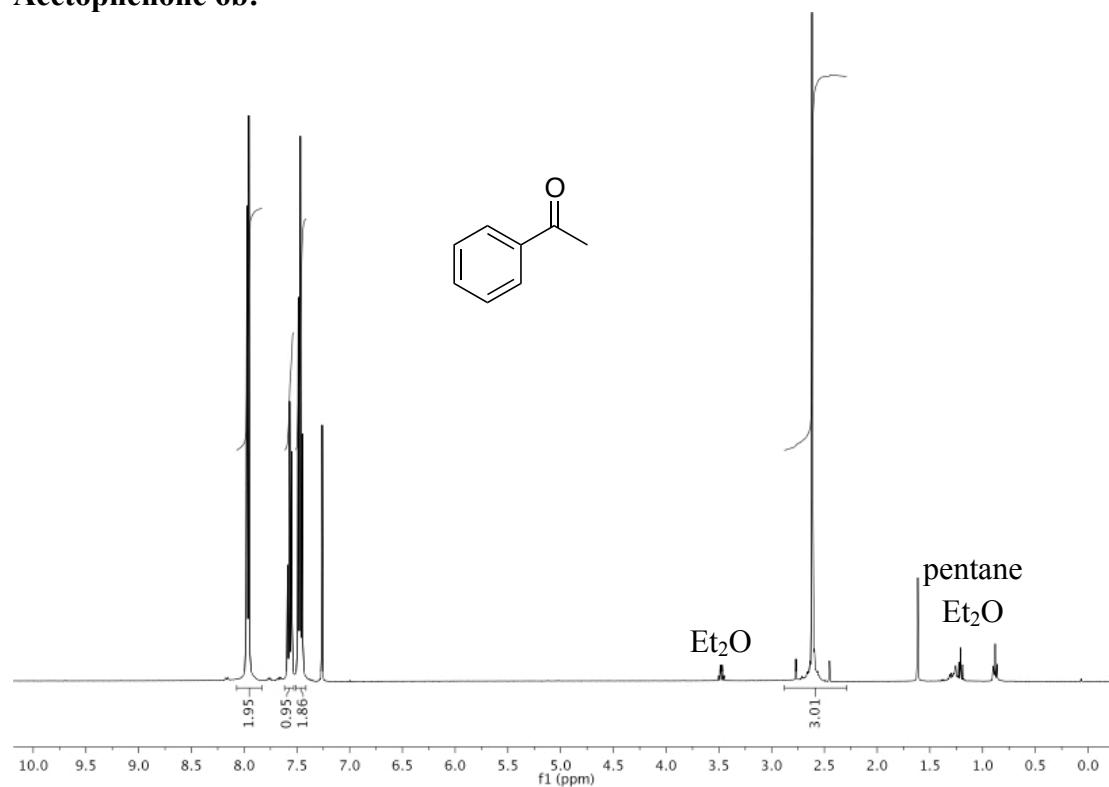

***p*-Nitrobenzaldehyde 6c:**

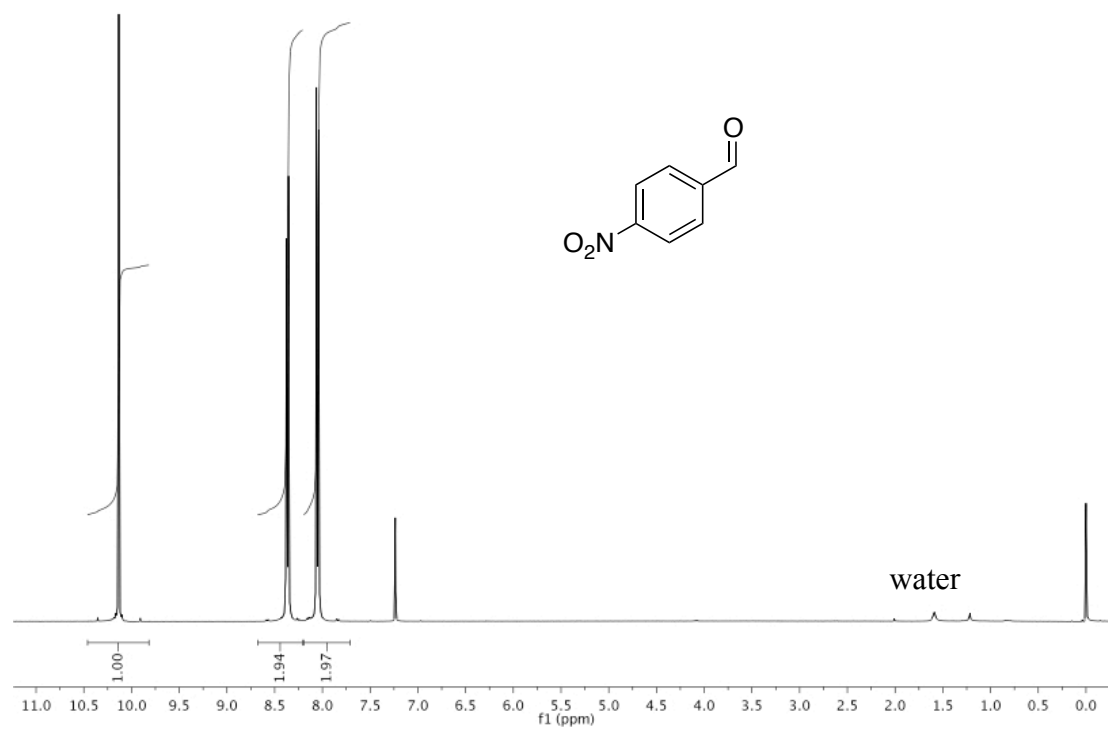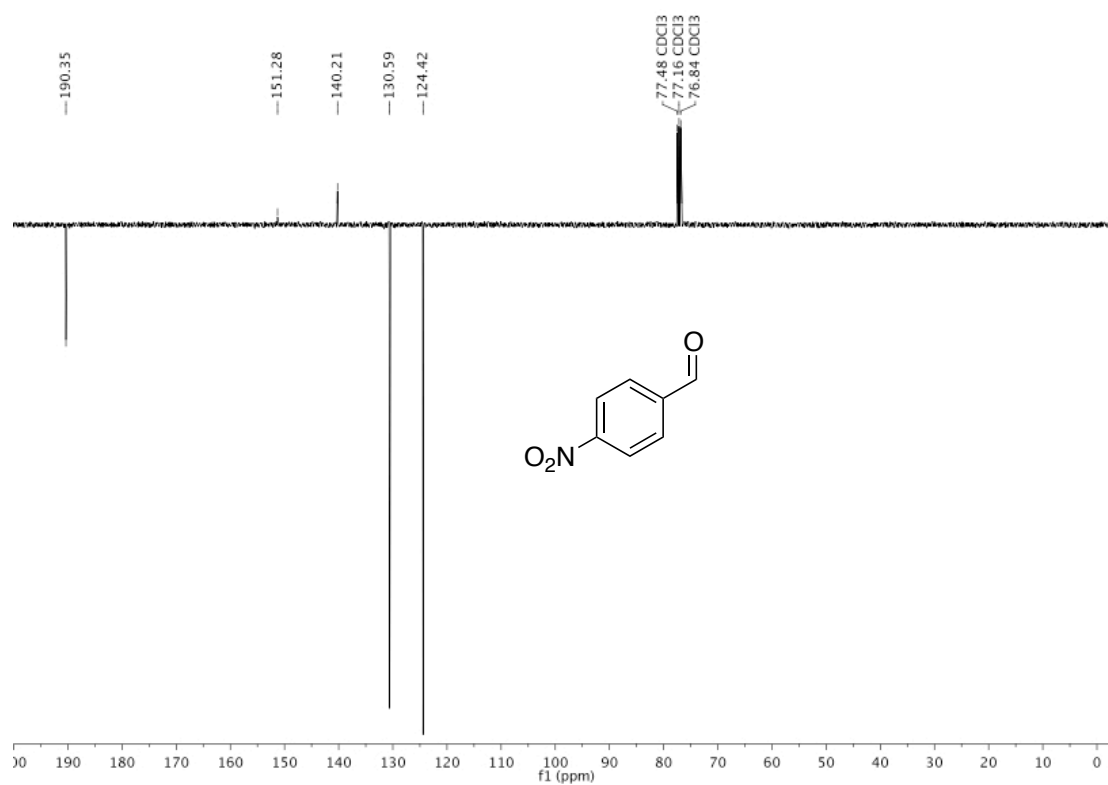



***p*-Methoxybenzaldehyde 6d:**

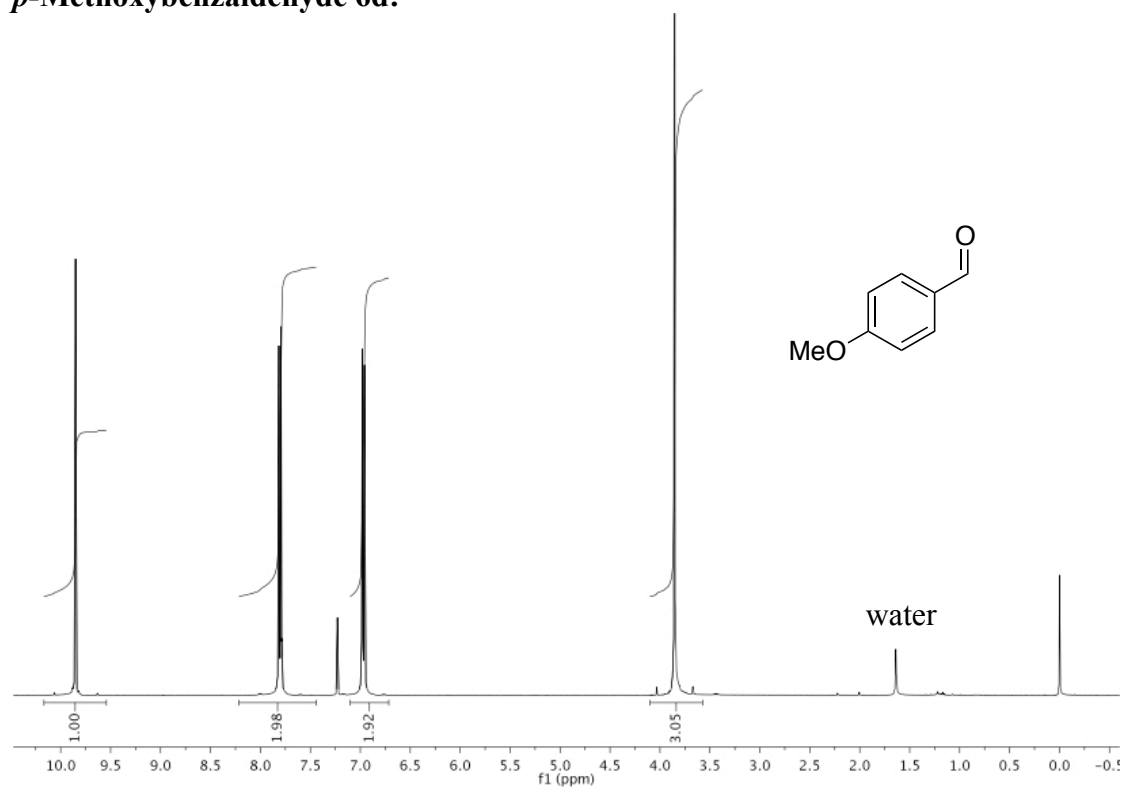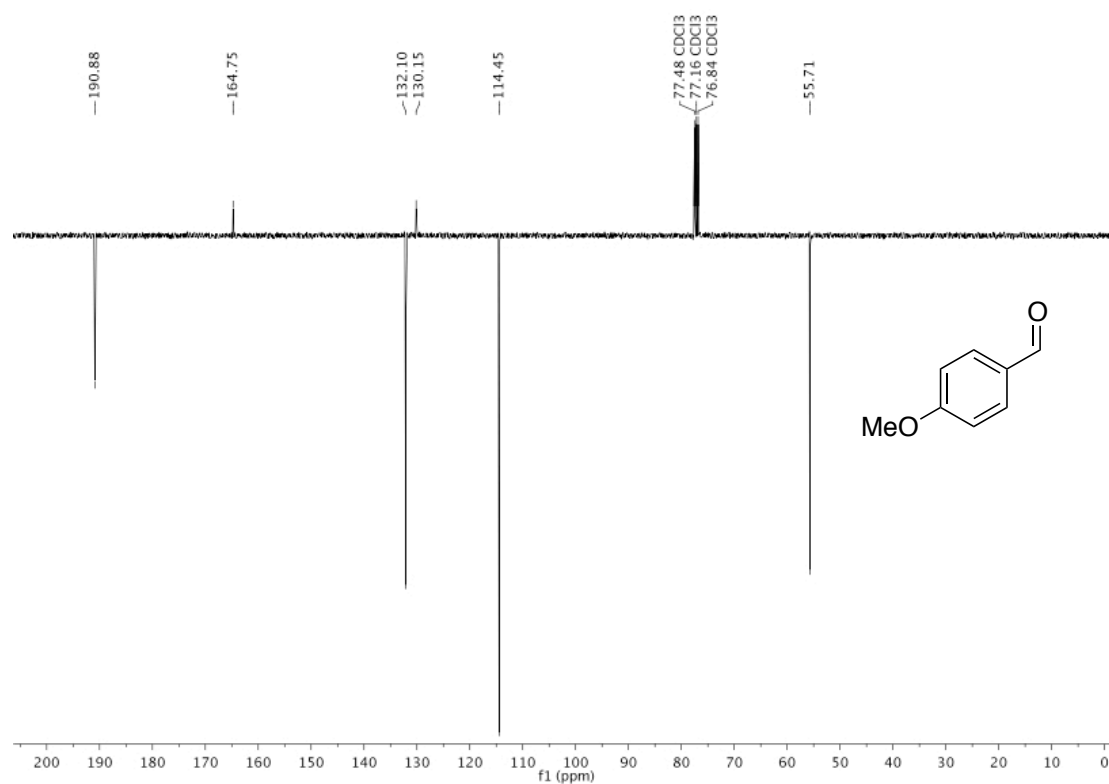

***p*-Cyanobenzaldehyde 6e:**

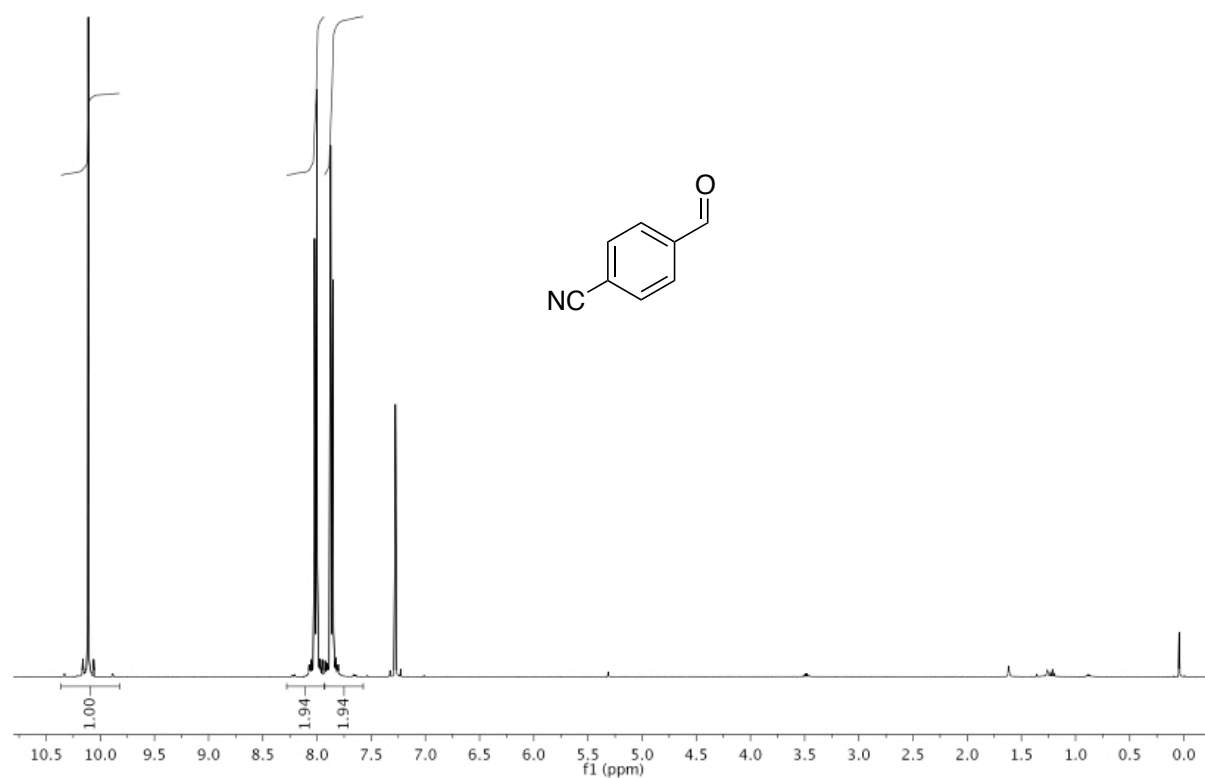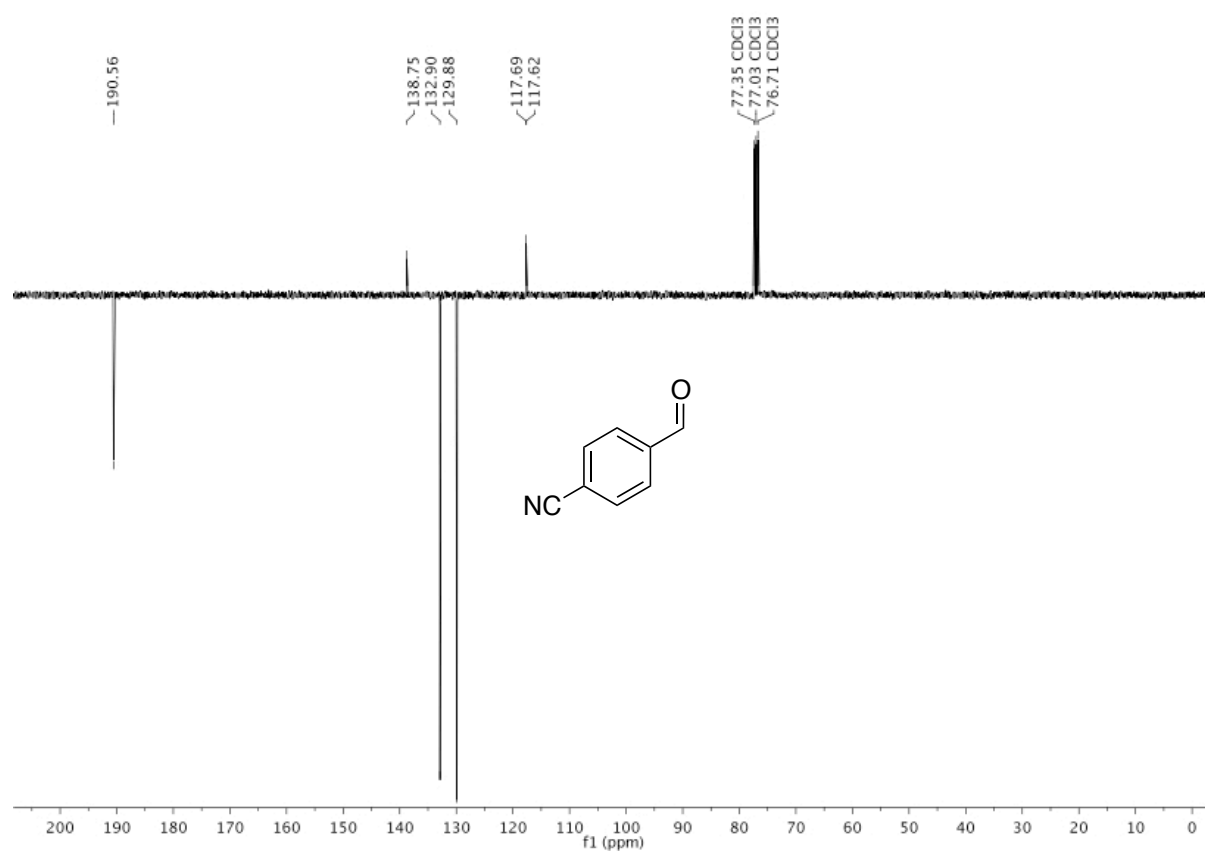

***trans*-Cinnamaldehyde 6f:**

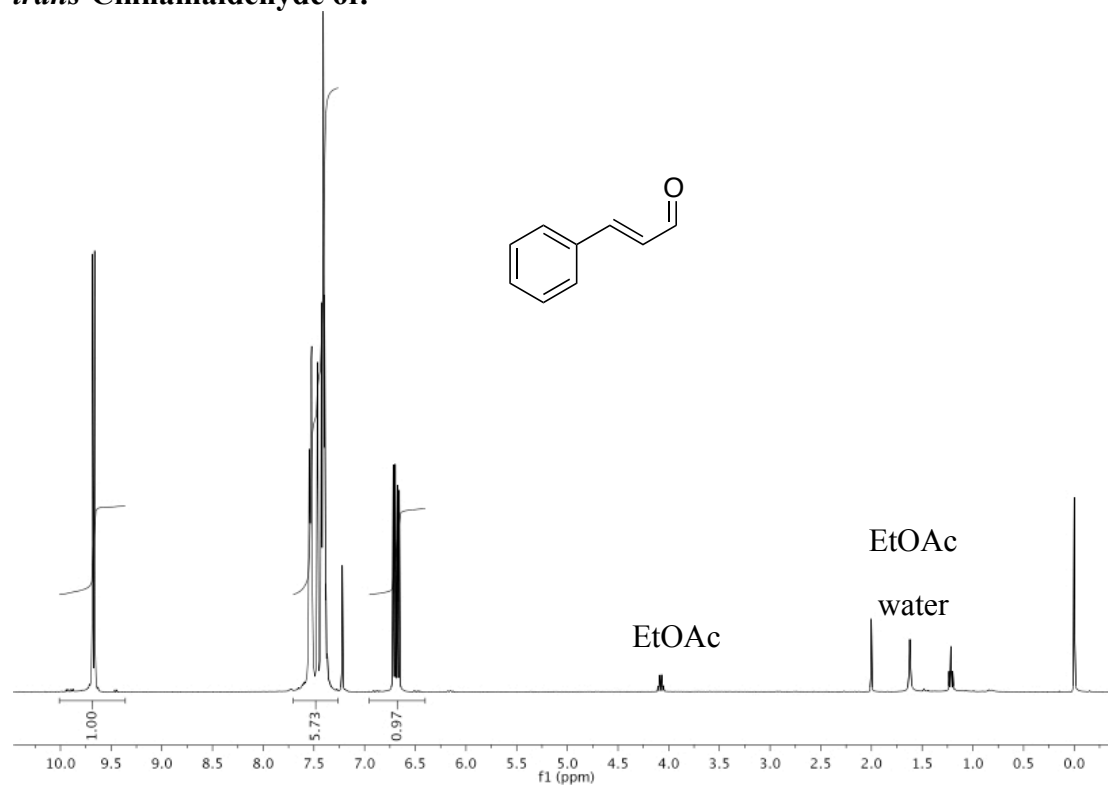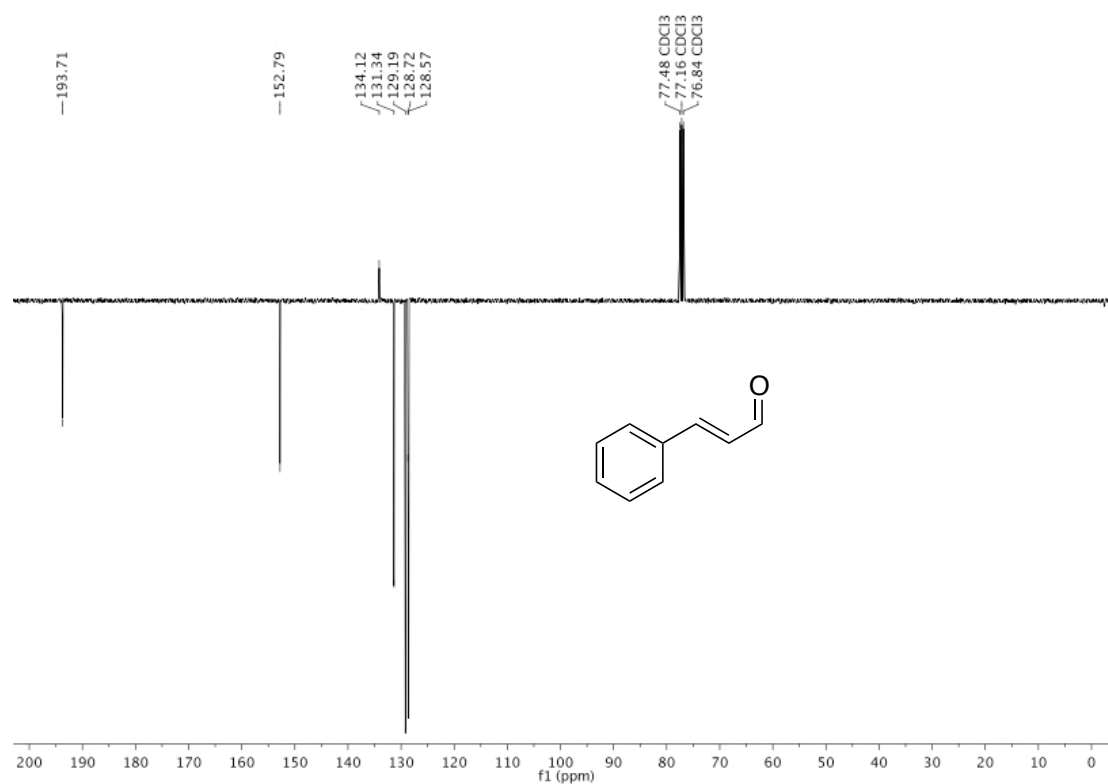

***trans,trans*-Deca-2,4-dienal 6g:**

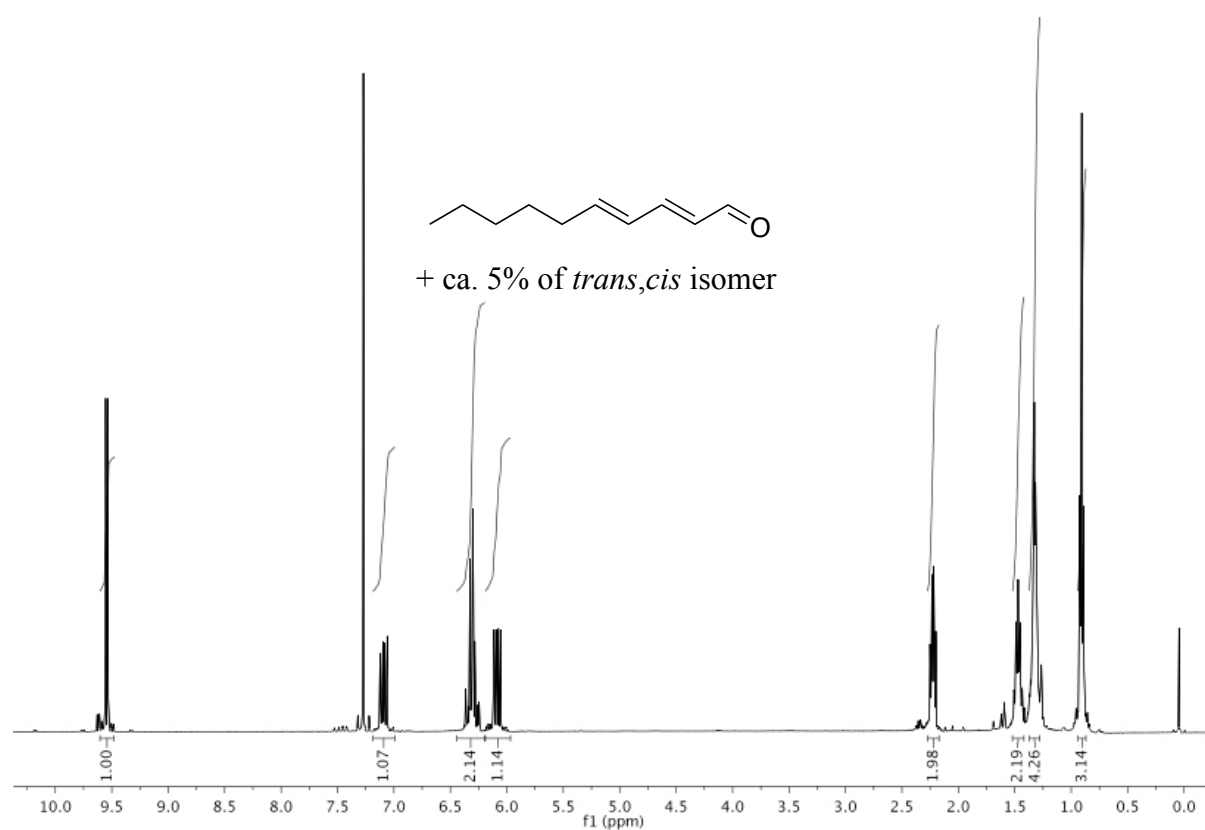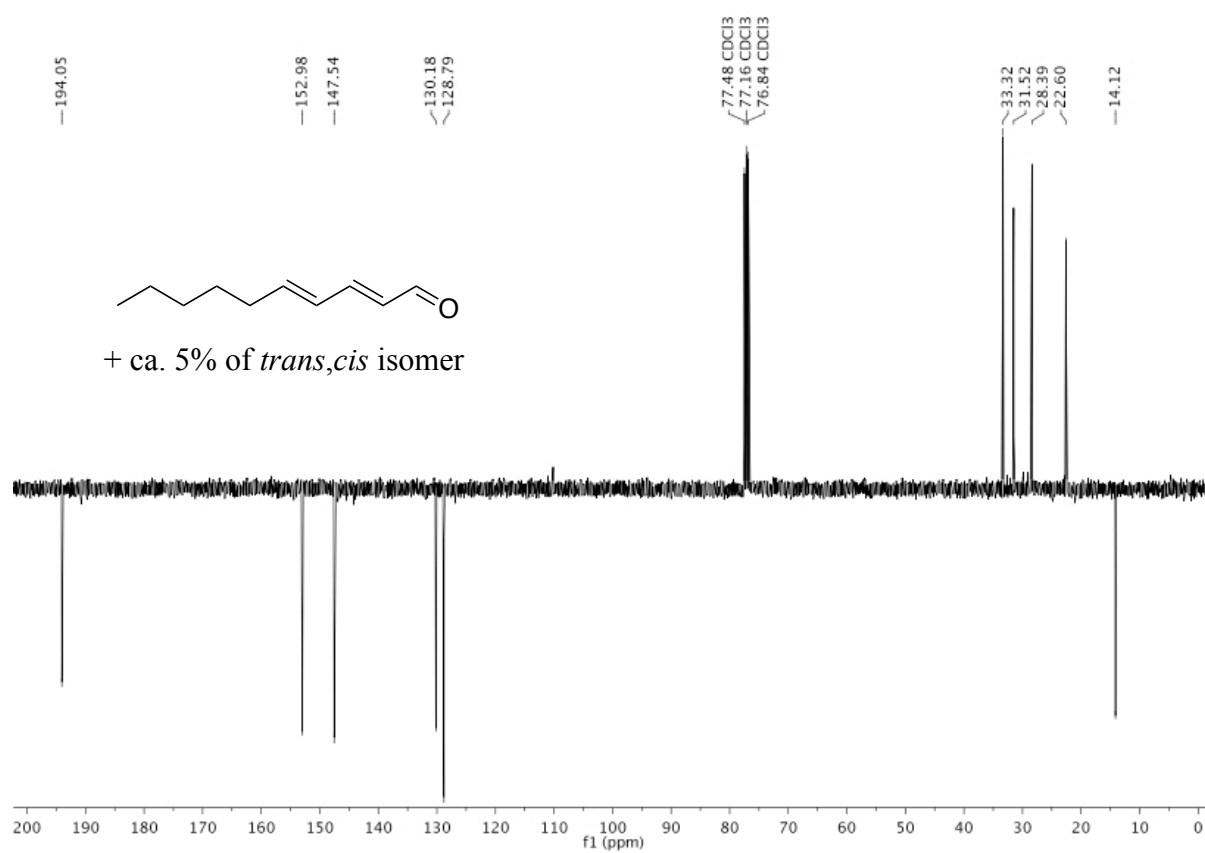

**Dodecanal 6h:**

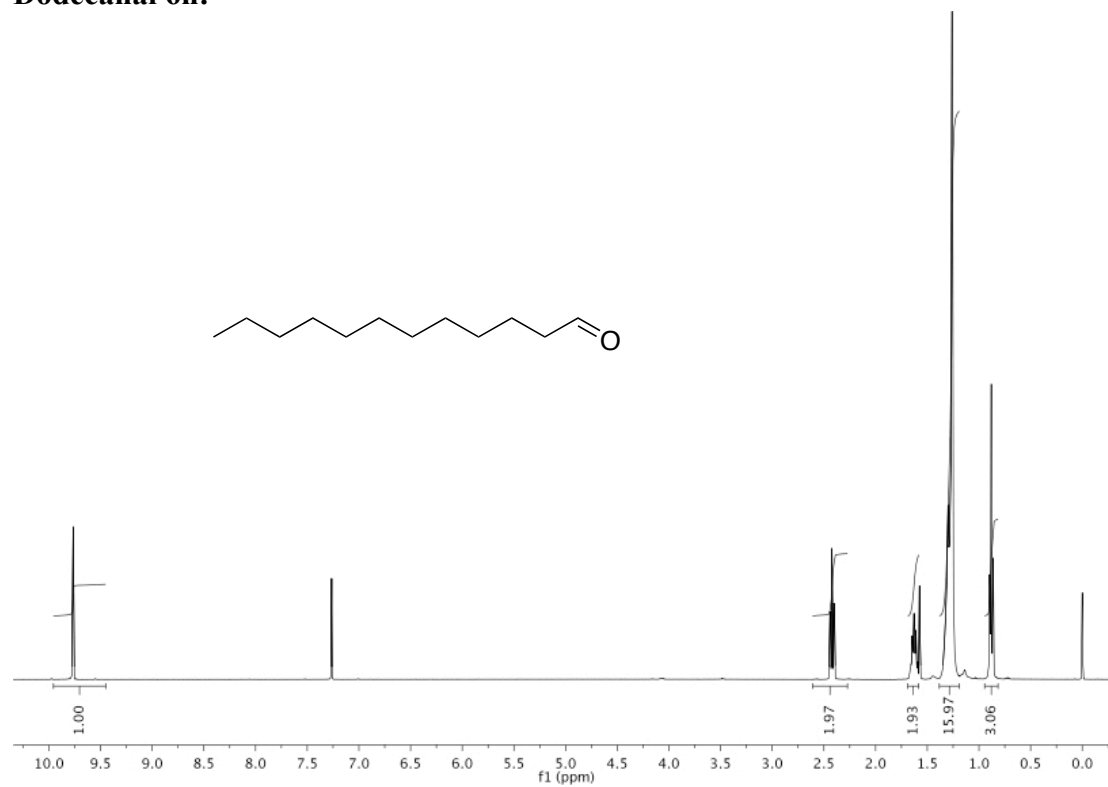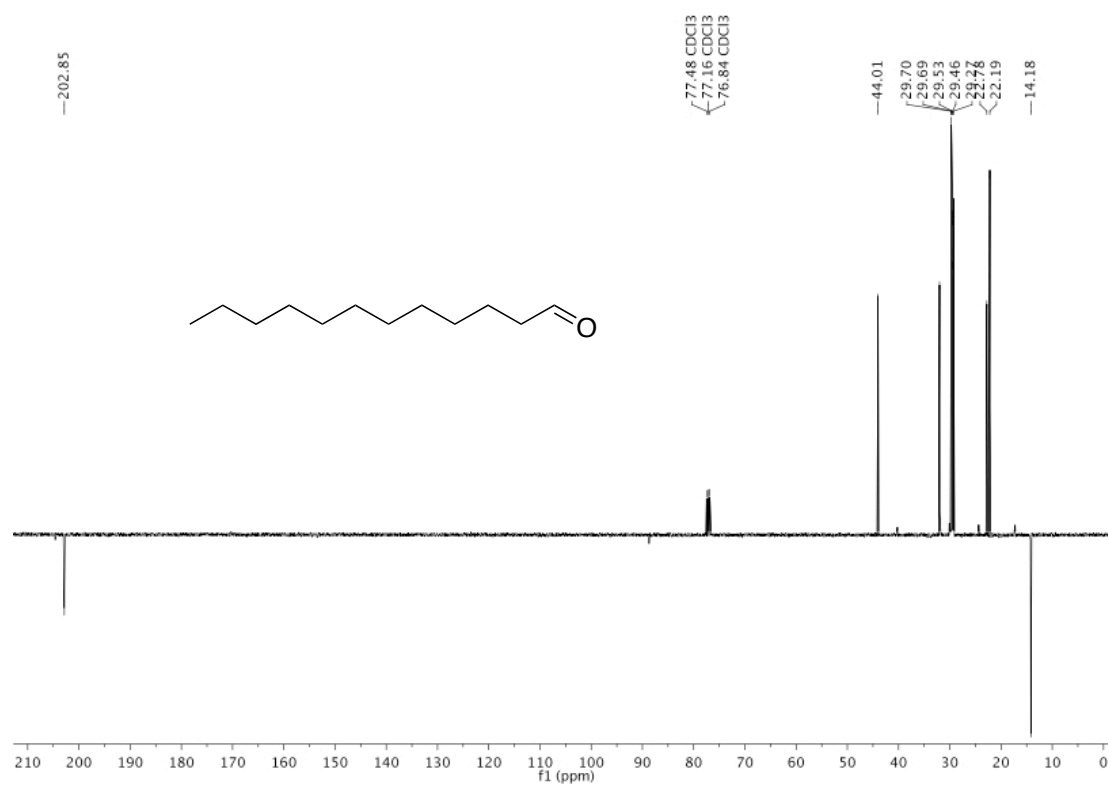

### 3-Phenylpropanal 6i:

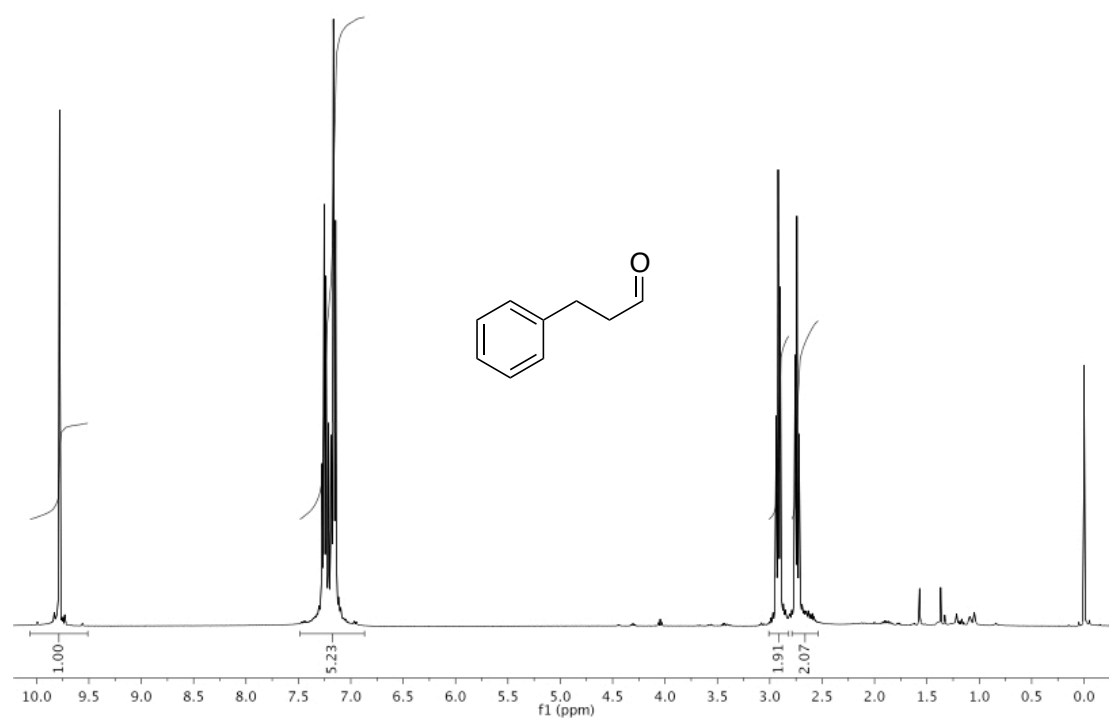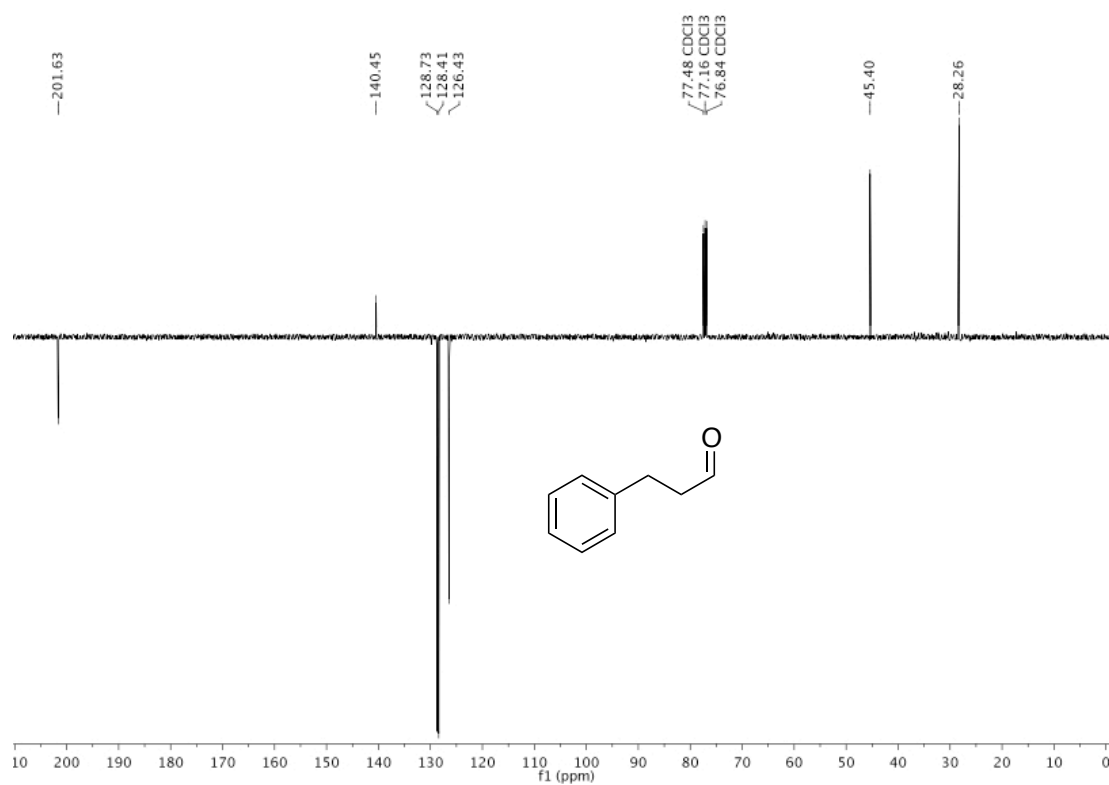

# 4-Phenylbutan-2-one 6j:

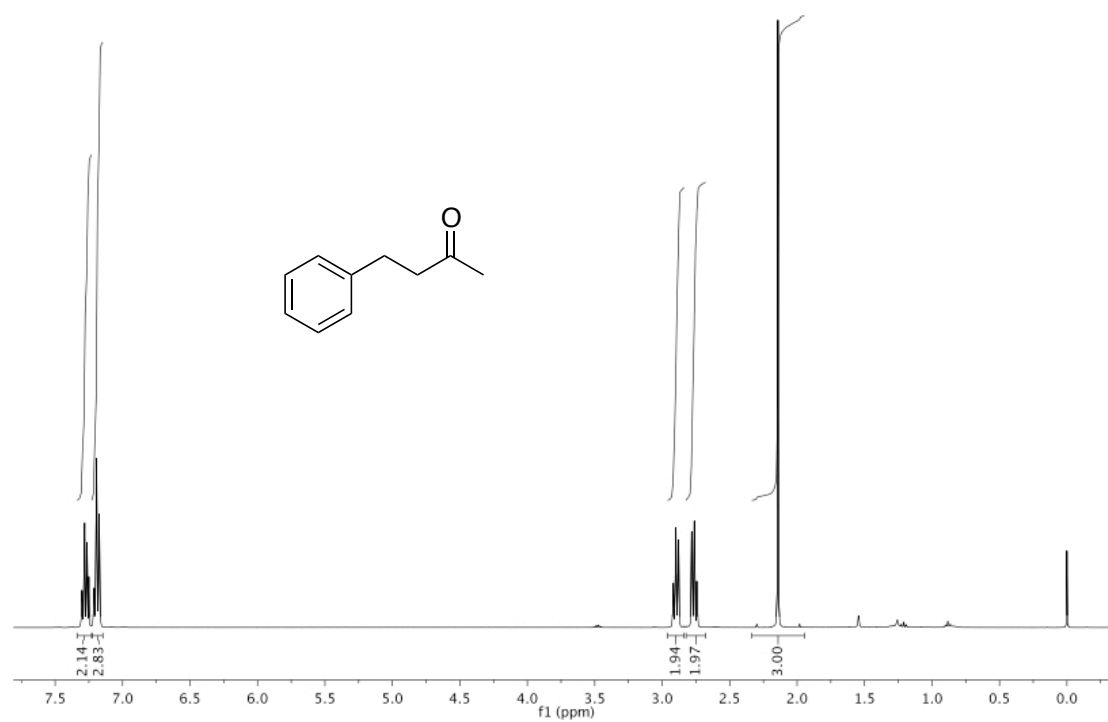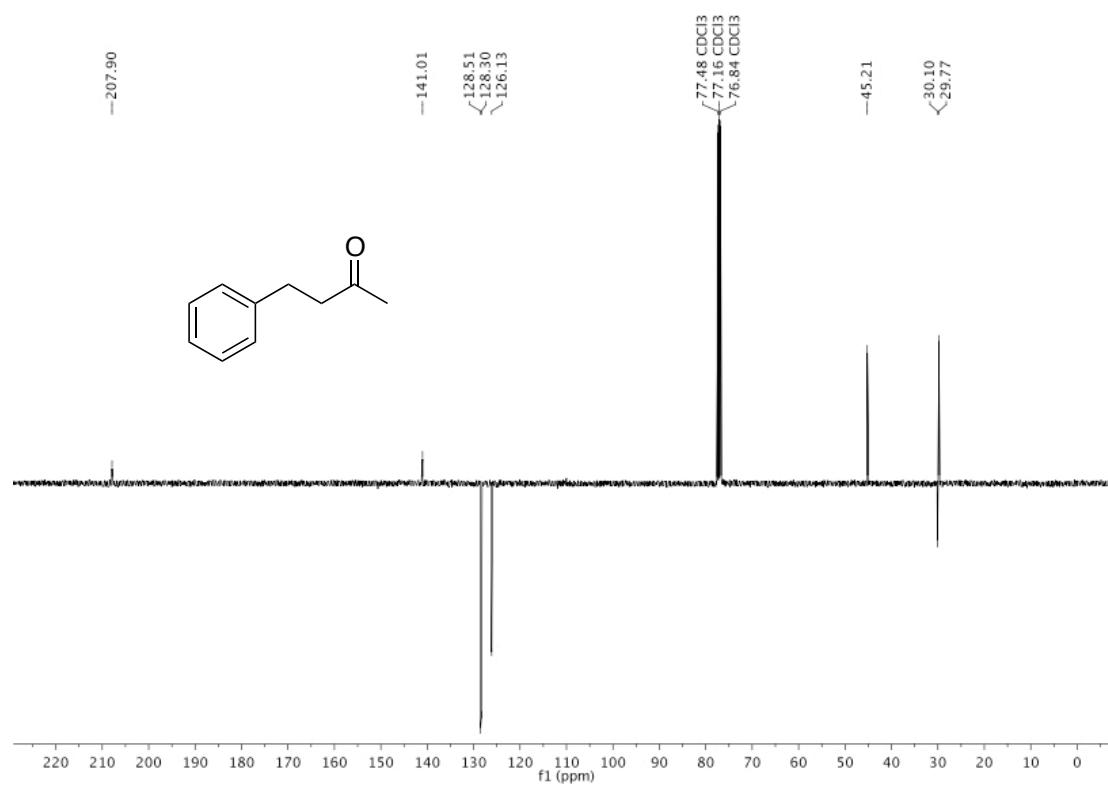

# Hex-5-ynal 6k:

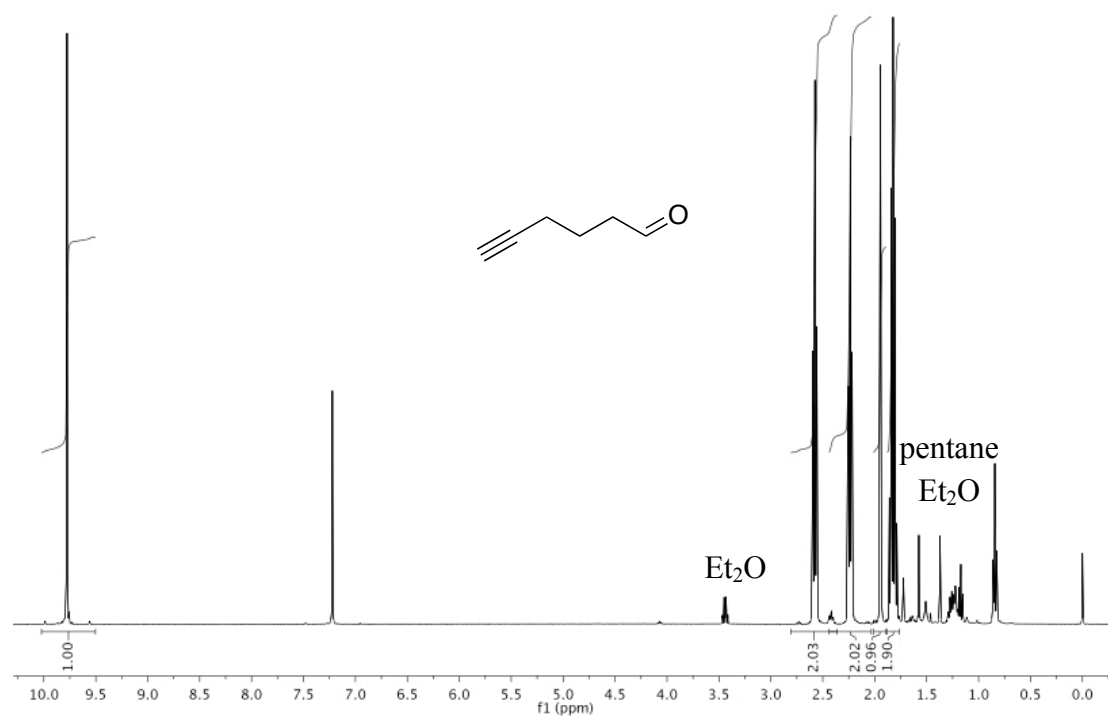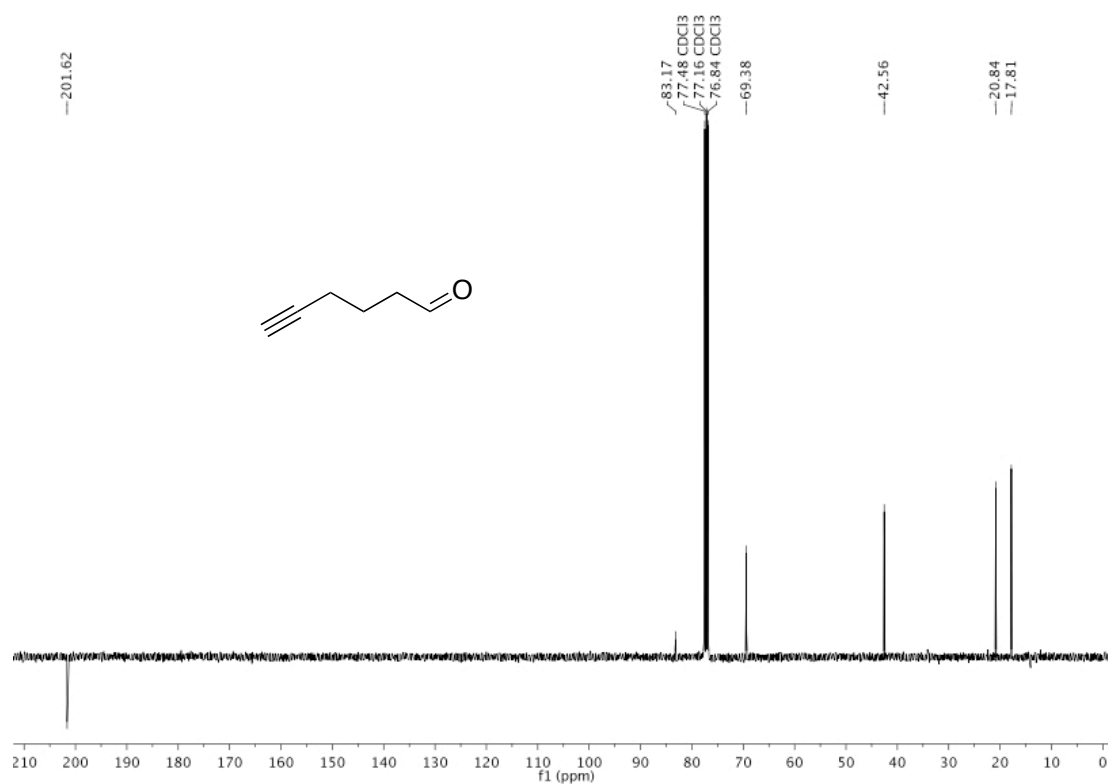



**6-(Triethylsilyloxy)hexanal 6l:**

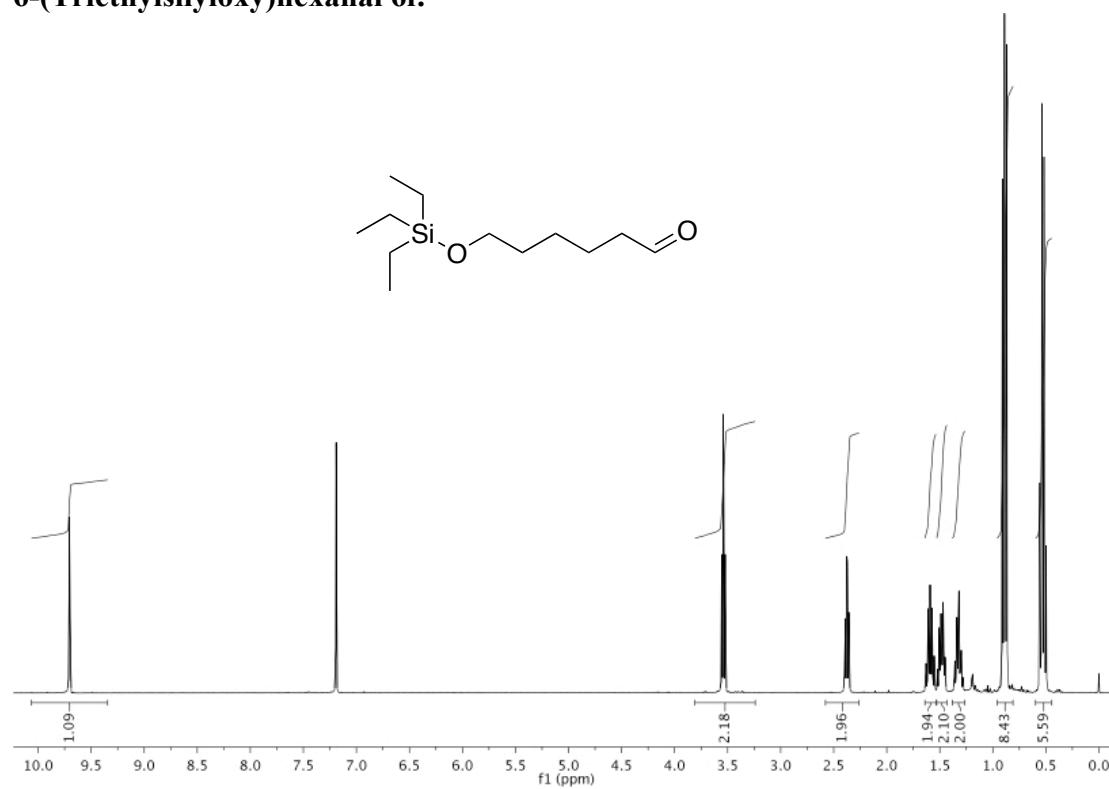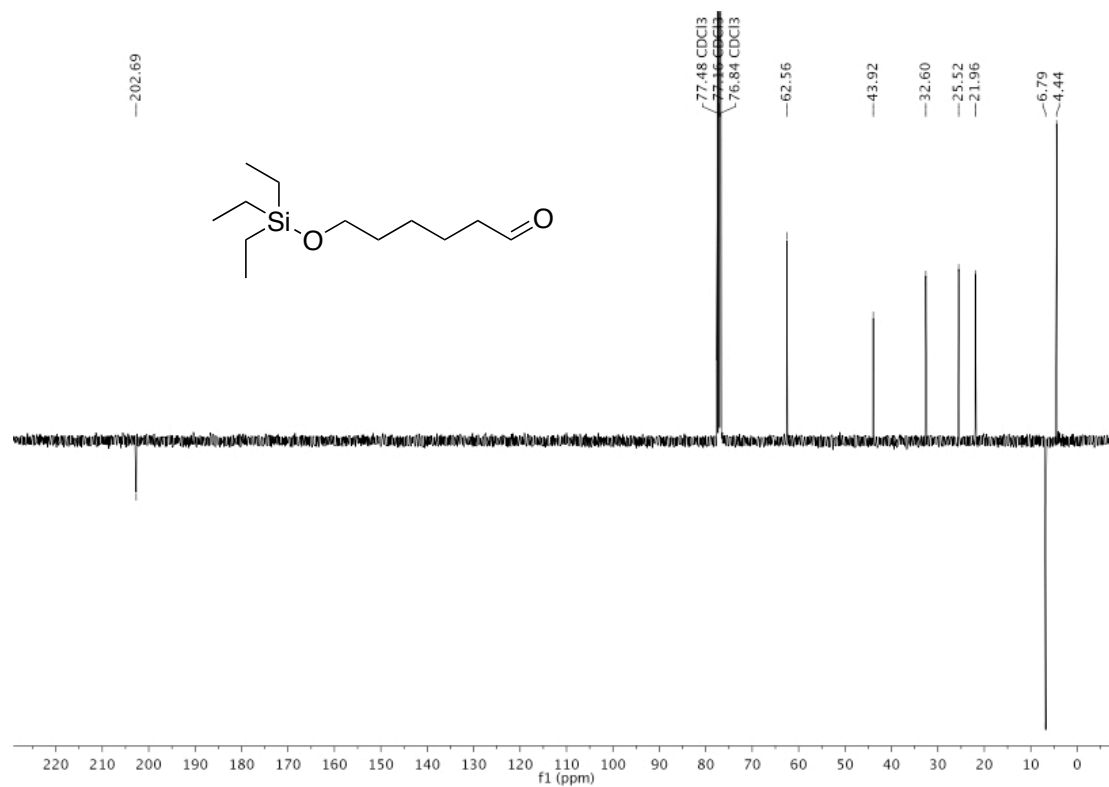

**4-(*tert*-Butyl)cyclohexanone 6m:**

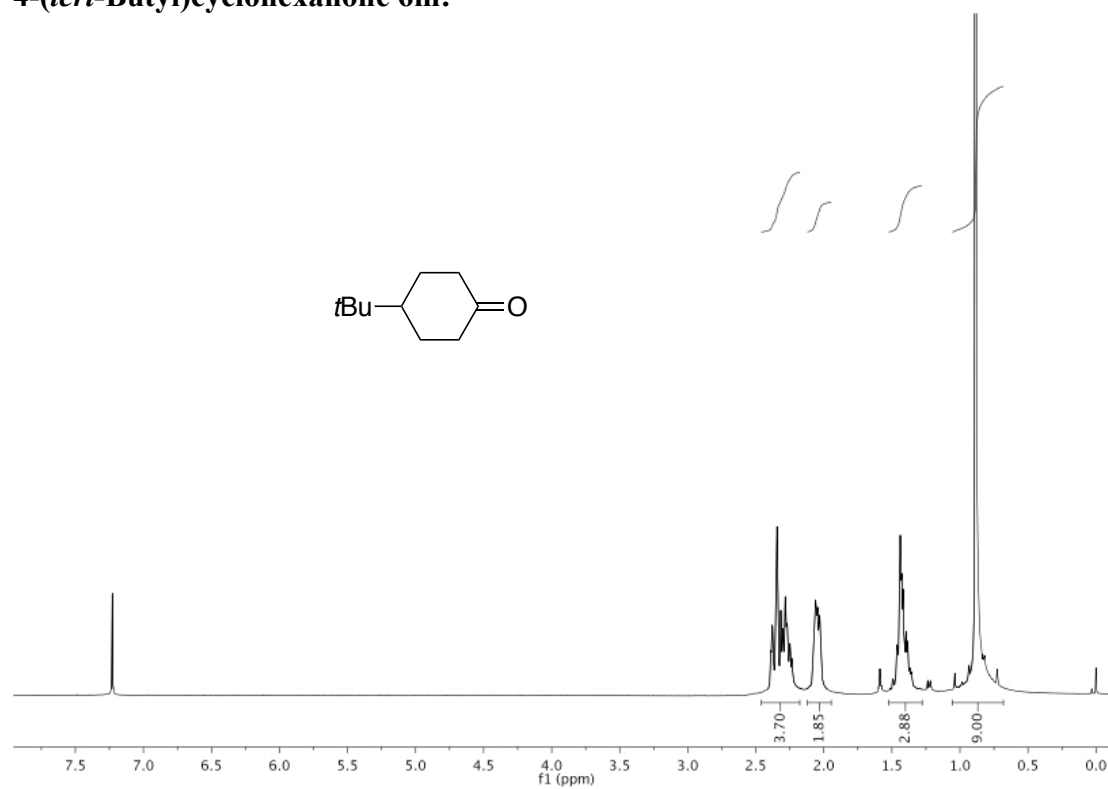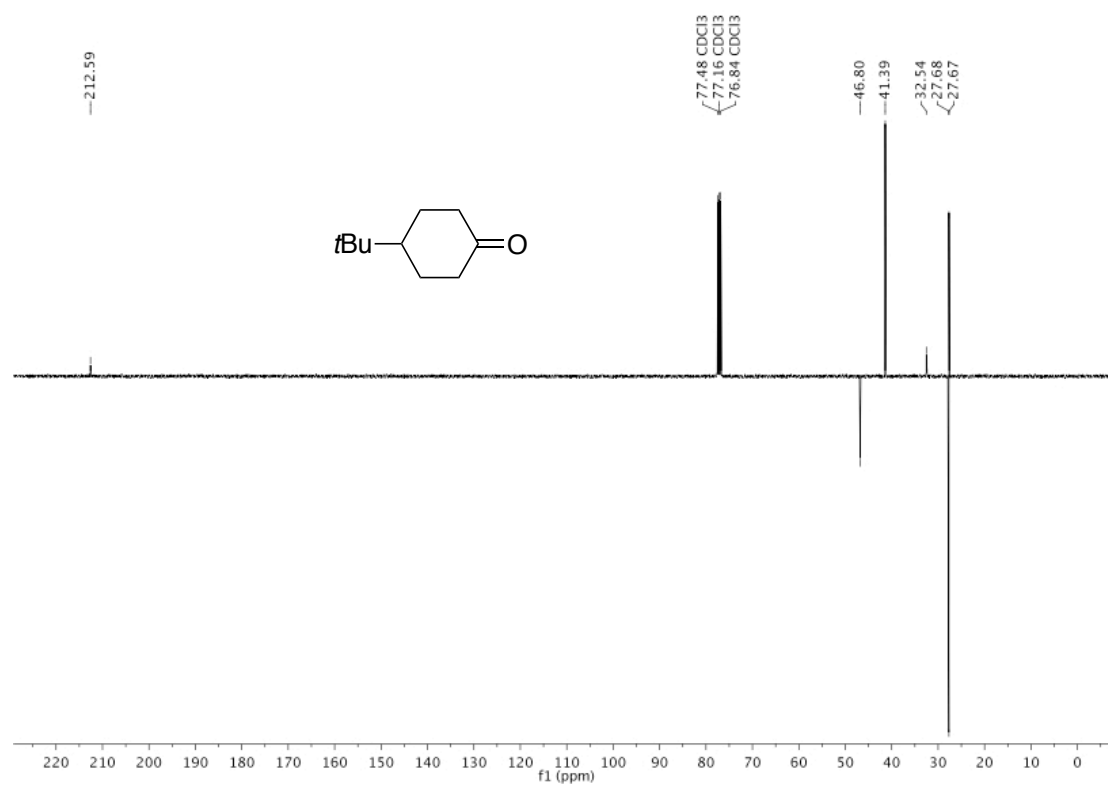

**3,5-Dimethylcyclohexanone 6n:**

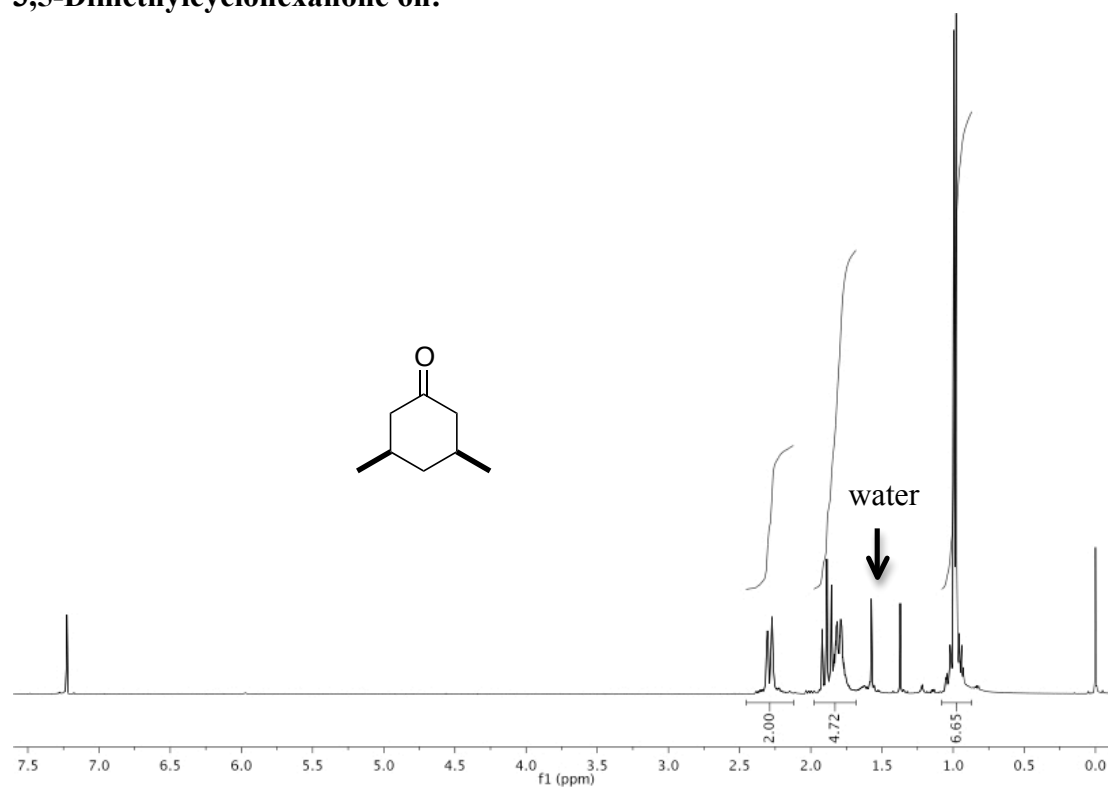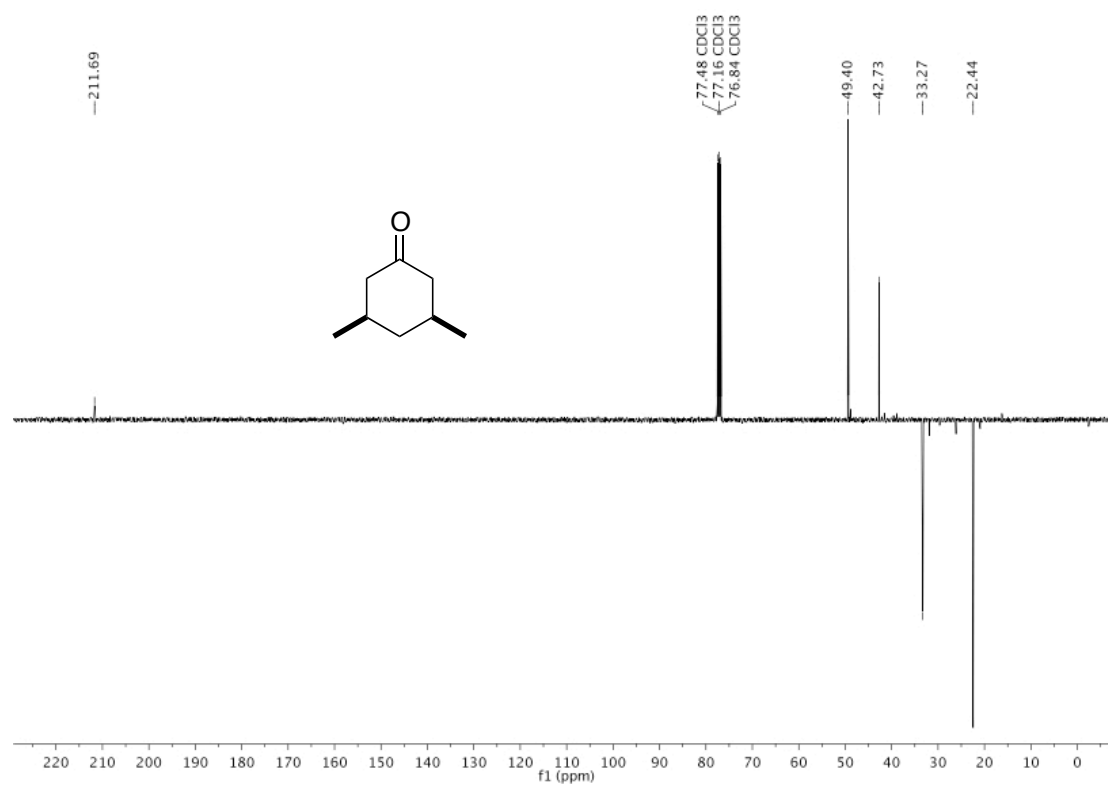

**L-Menthone 6o:**

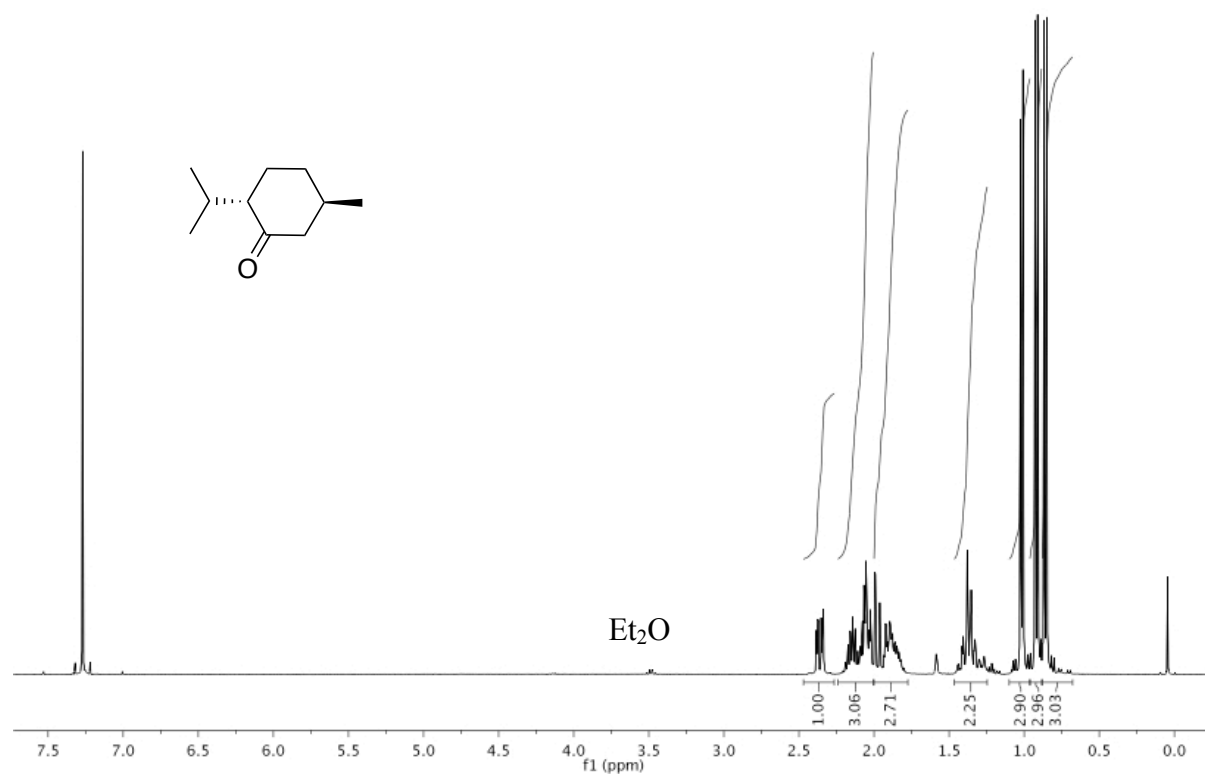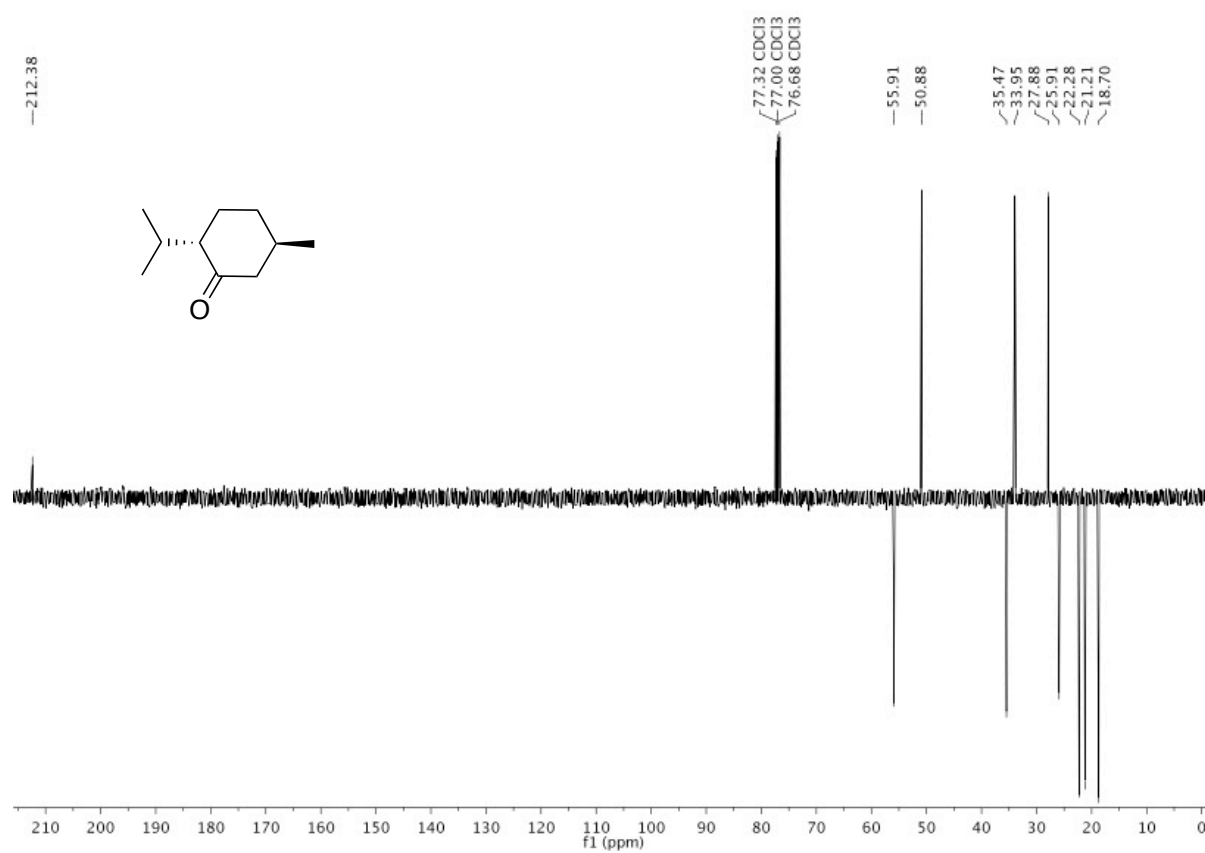

**(1*R*,2*S*,5*R*)-2-Isopropyl-5-methylcyclohexyl nitrite 7o:**

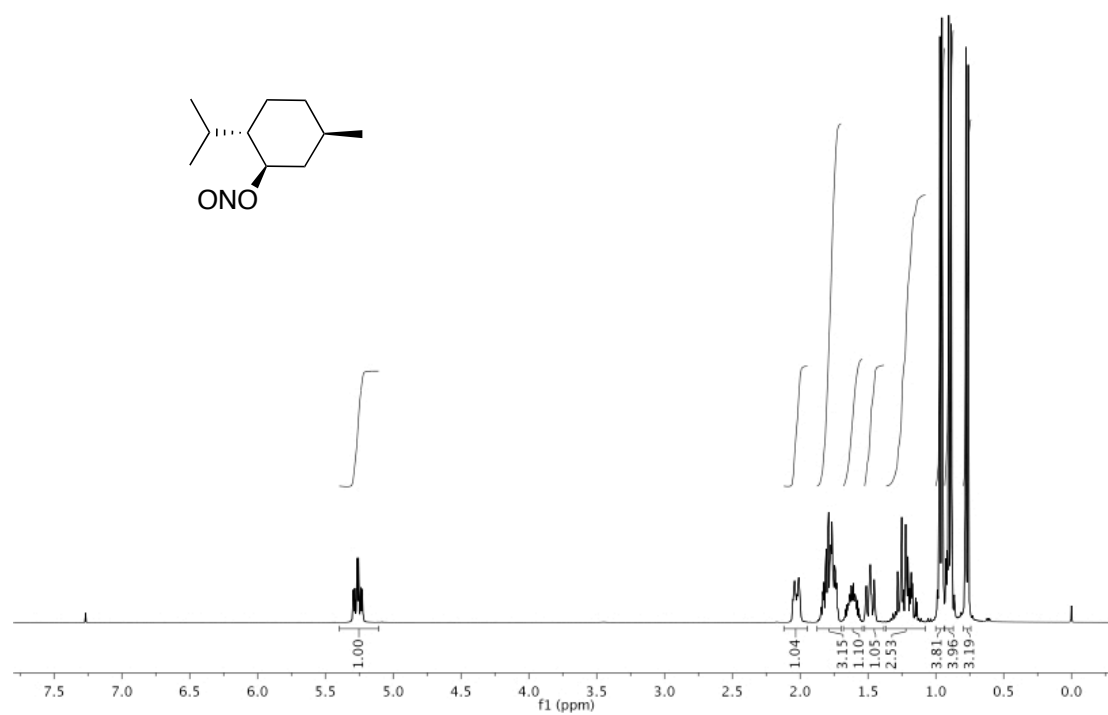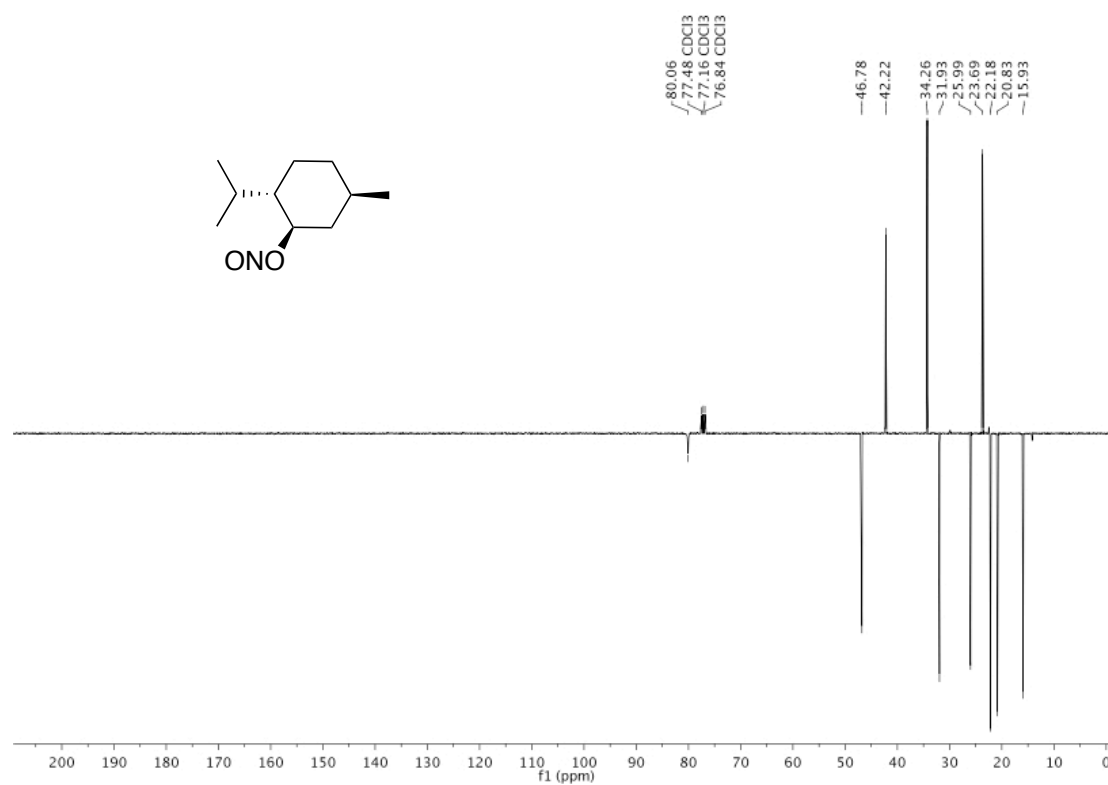

**(S)-4-(*tert*-Butyldiphenylsilyloxy)-2-methylbutanal 6p:**

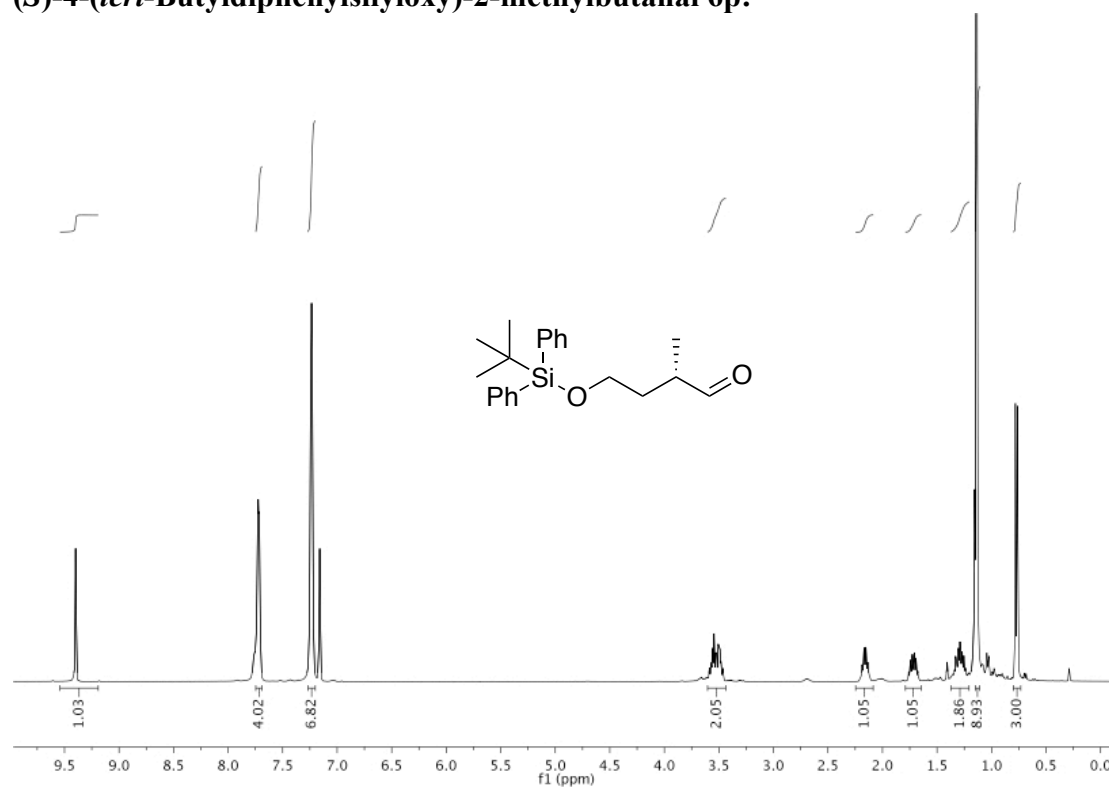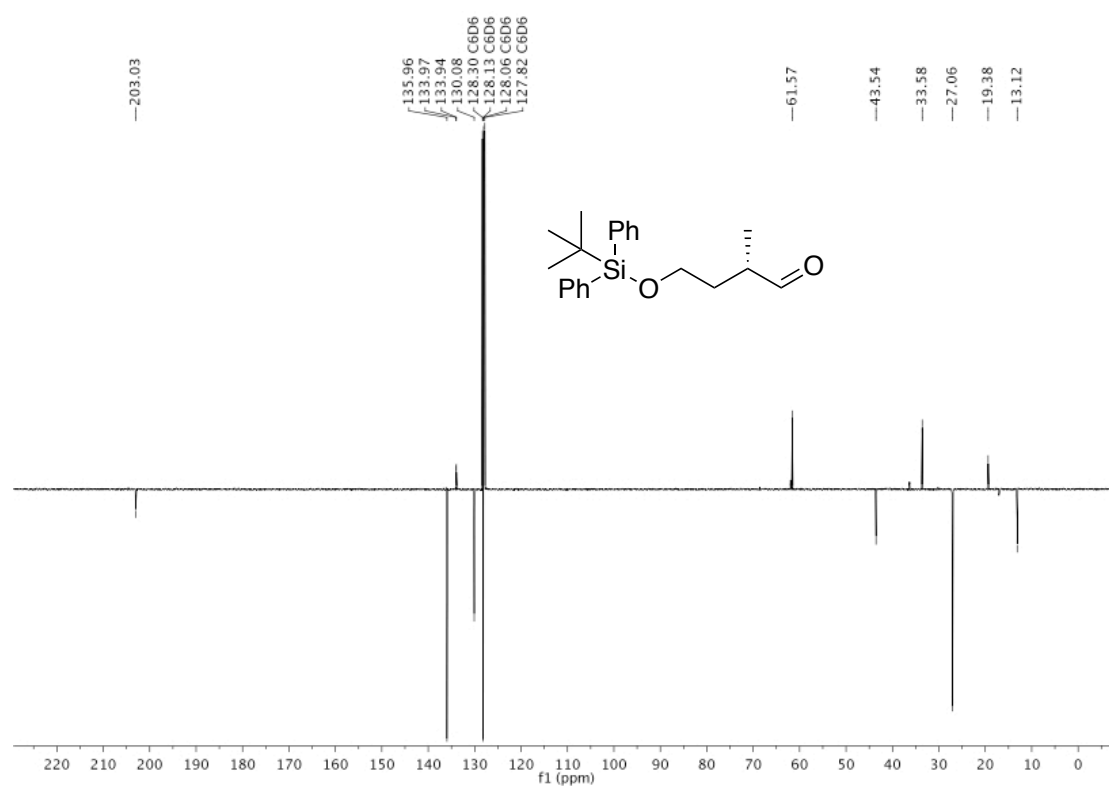

**Crude spectra of Mosher ester S1:  
<sup>1</sup>H NMR**

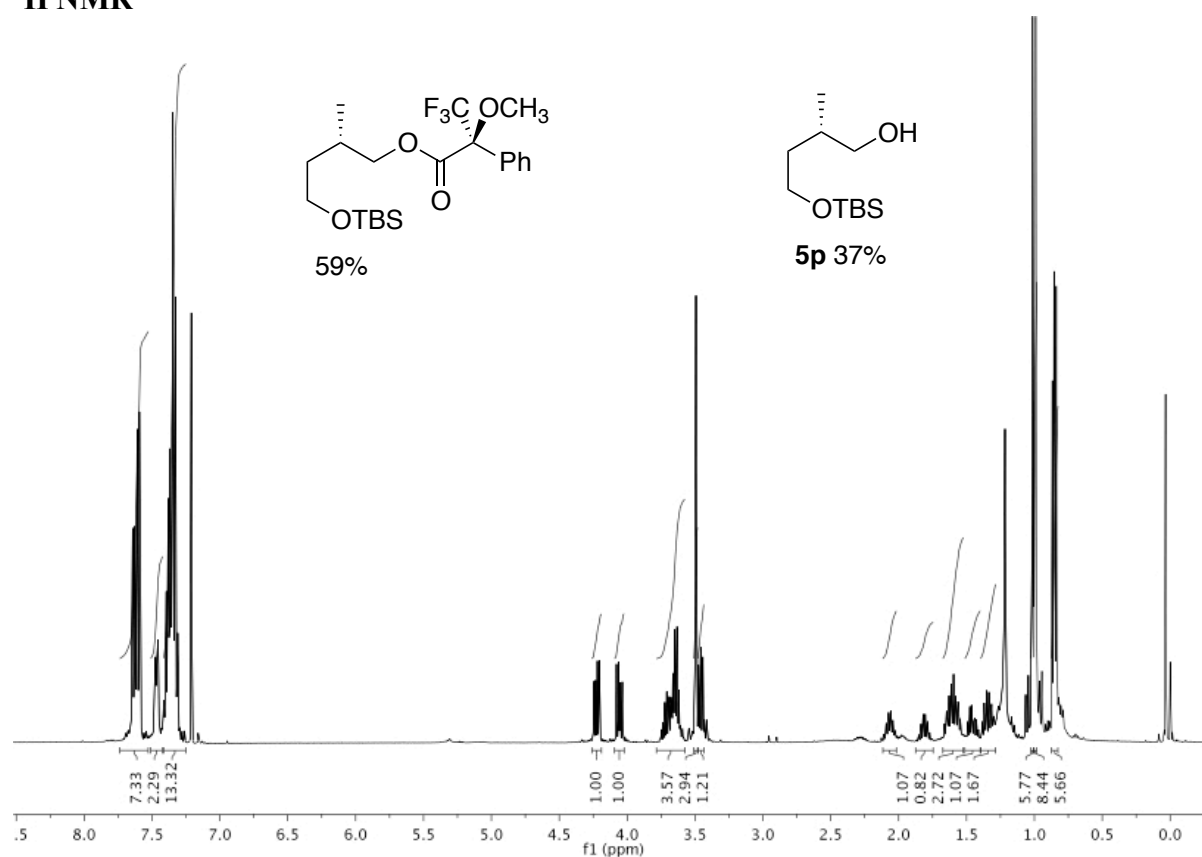

**<sup>19</sup>F NMR**

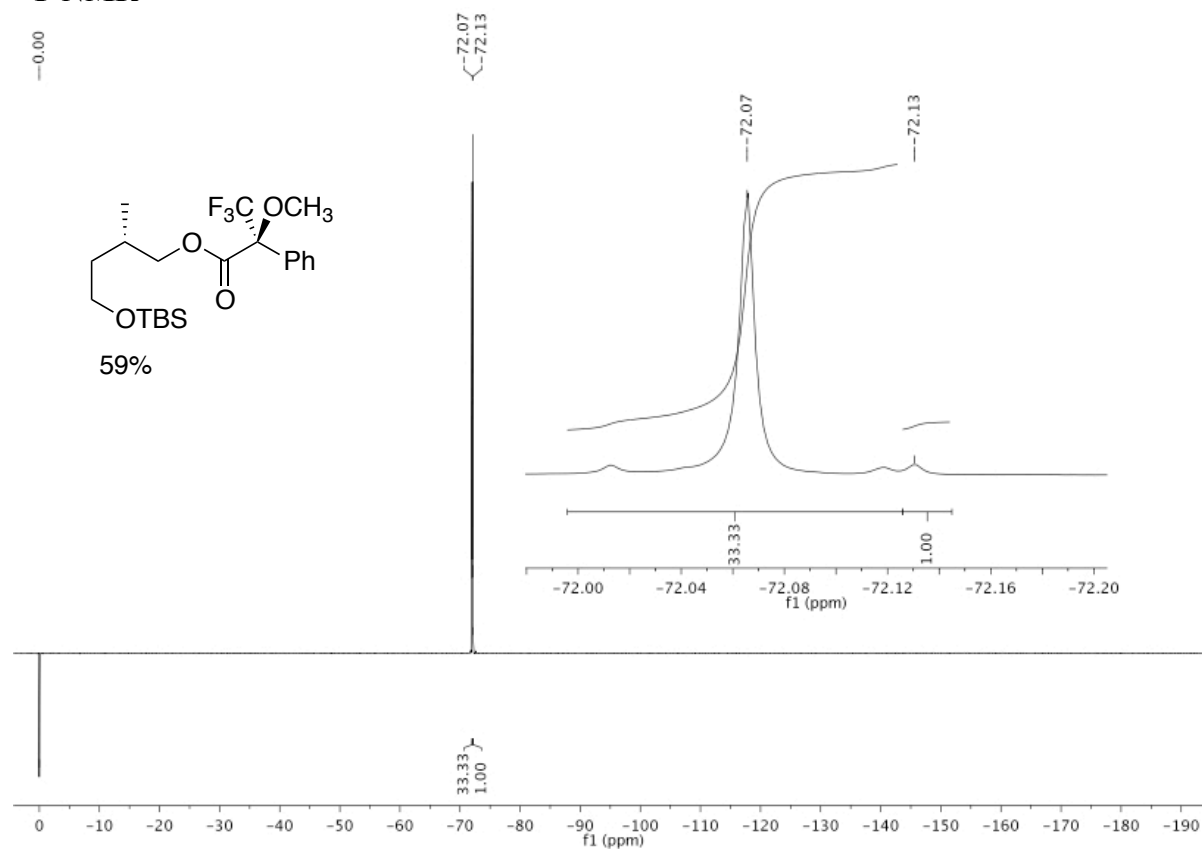

Chemical structure of the precursor (59% yield):

CC(C)(C)OC(=O)C(F)(F)F

Chemical structure of compound 5p (37% yield):

CC(C)(C)OC(=O)C(F)(F)F

<sup>13</sup>C NMR spectrum (ppm):

- 166.75
- 135.71
- 135.67
- 133.92
- 133.91
- 133.63
- 133.62
- 132.53
- 129.85
- 129.77
- 129.69
- 128.52
- 127.84
- 127.80
- 127.49
- 124.93
- 122.07
- 119.20
- 77.48 CDCl<sub>3</sub>
- 77.16 CDCl<sub>3</sub>
- 76.84 CDCl<sub>3</sub>
- 71.40
- 68.41
- 62.64
- 61.56
- 55.53
- 36.89
- 35.92
- 34.00
- 29.60
- 26.98
- 26.97
- 19.32
- 19.28
- 17.27
- 16.78

Integrations (5p):

- 5p
- 5p
- 5p
- 5p

Arrow points to peak at 31.0 ppm labeled "grease".



**(S)-N-(*tert*-Butyloxycarbonyl)prolinal 6q:**

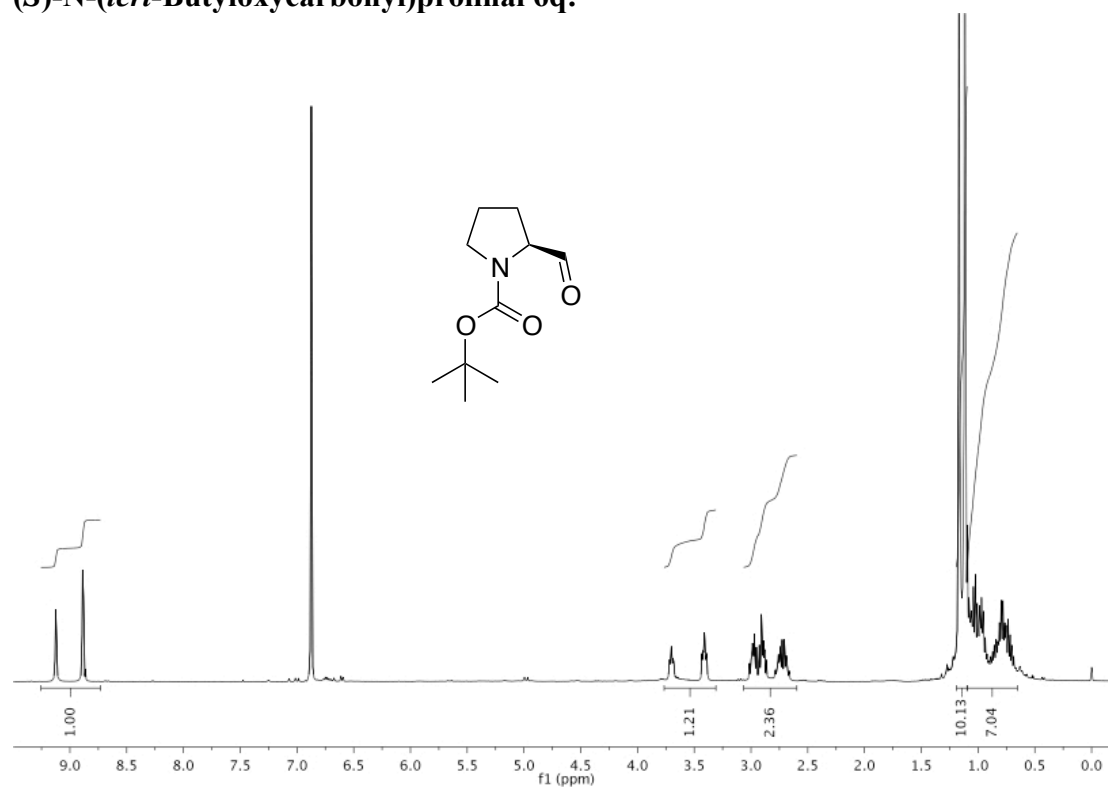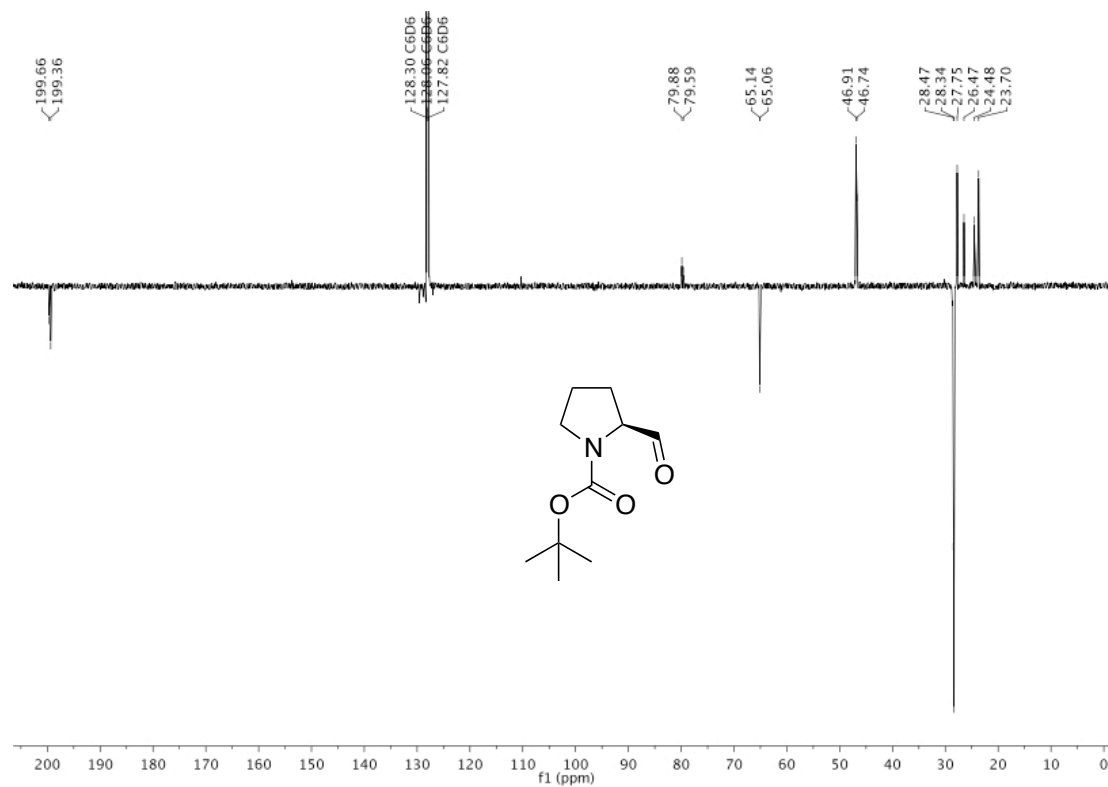

**(S)-tert-butyl 2-(benzyloxymethyl)pyrrolidine-1-carboxylate S2:**

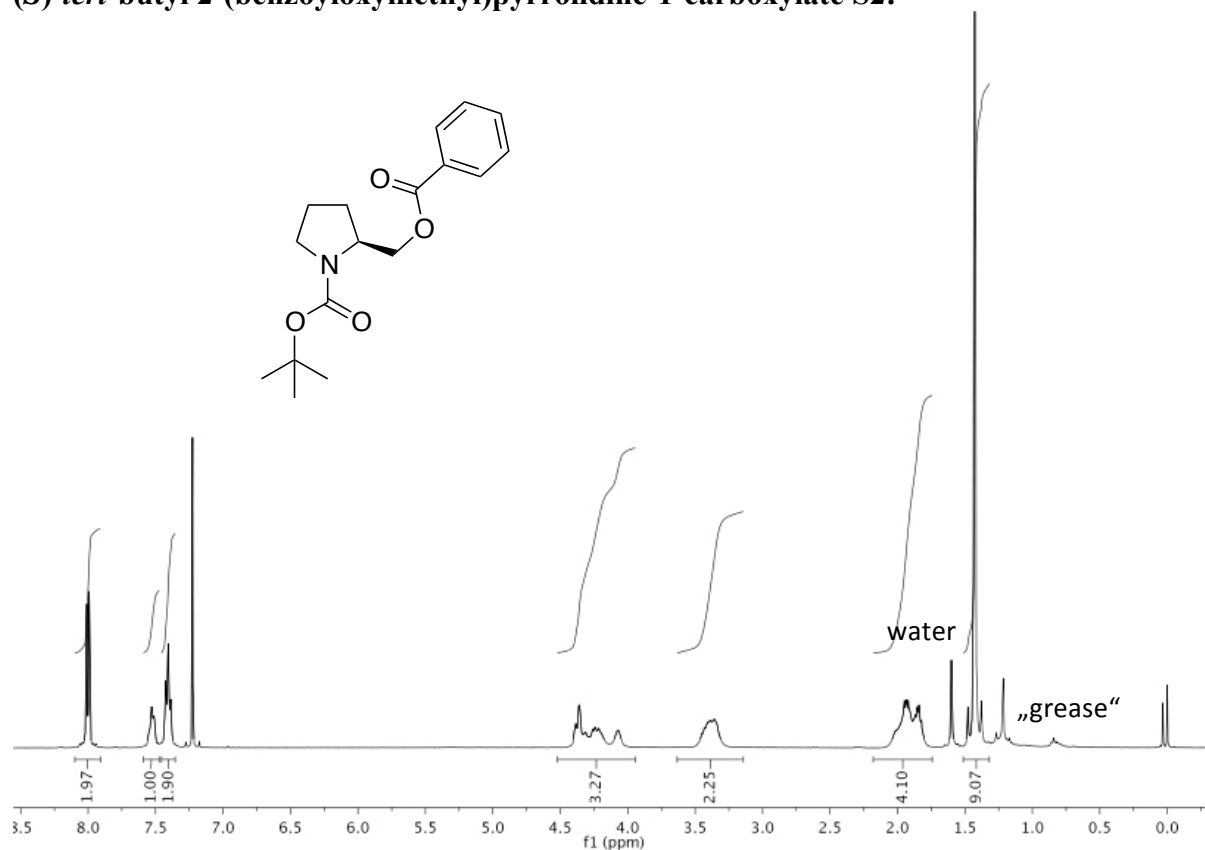

Compound **S2** has two sets of signals in <sup>13</sup>C NMR due to rotamers.<sup>S29</sup>

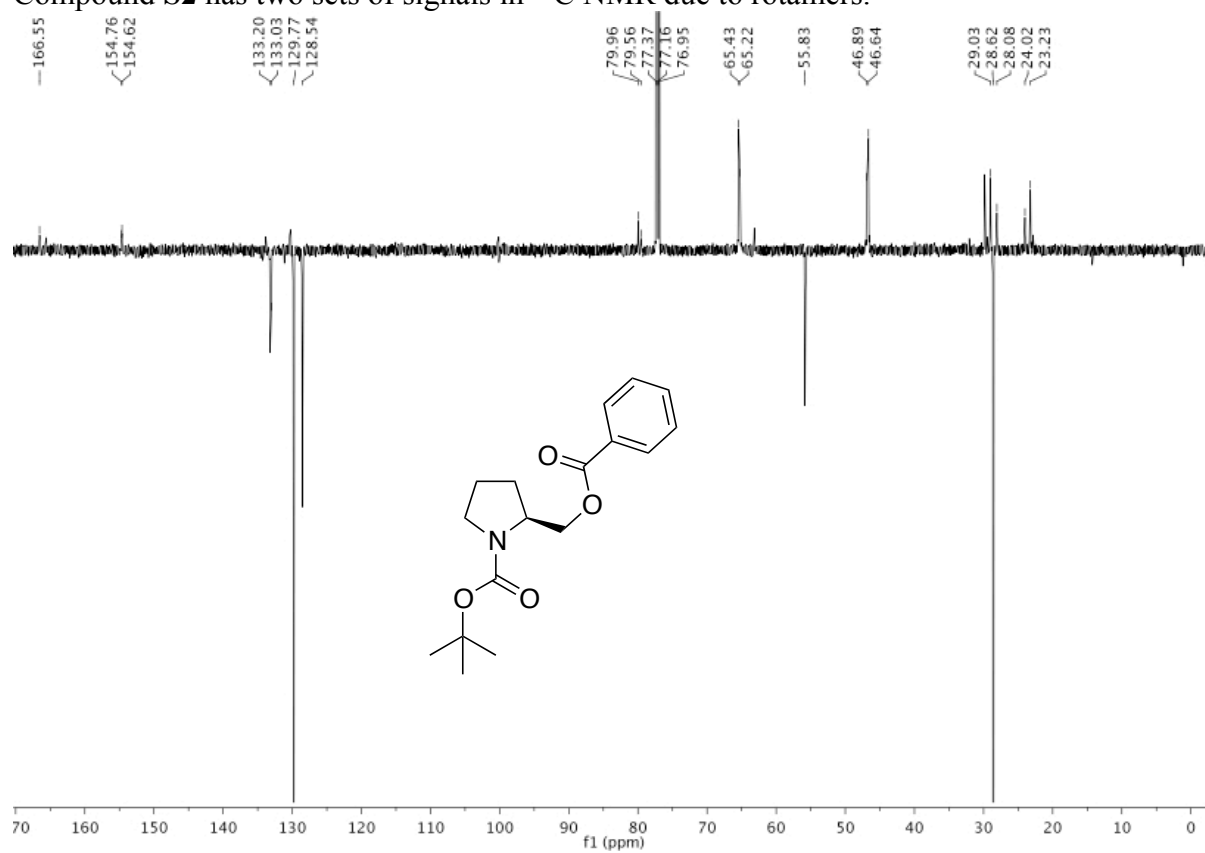

**(S)-N-(*tert*-Butyloxycarbonyl)phenylalaninal 7r:**

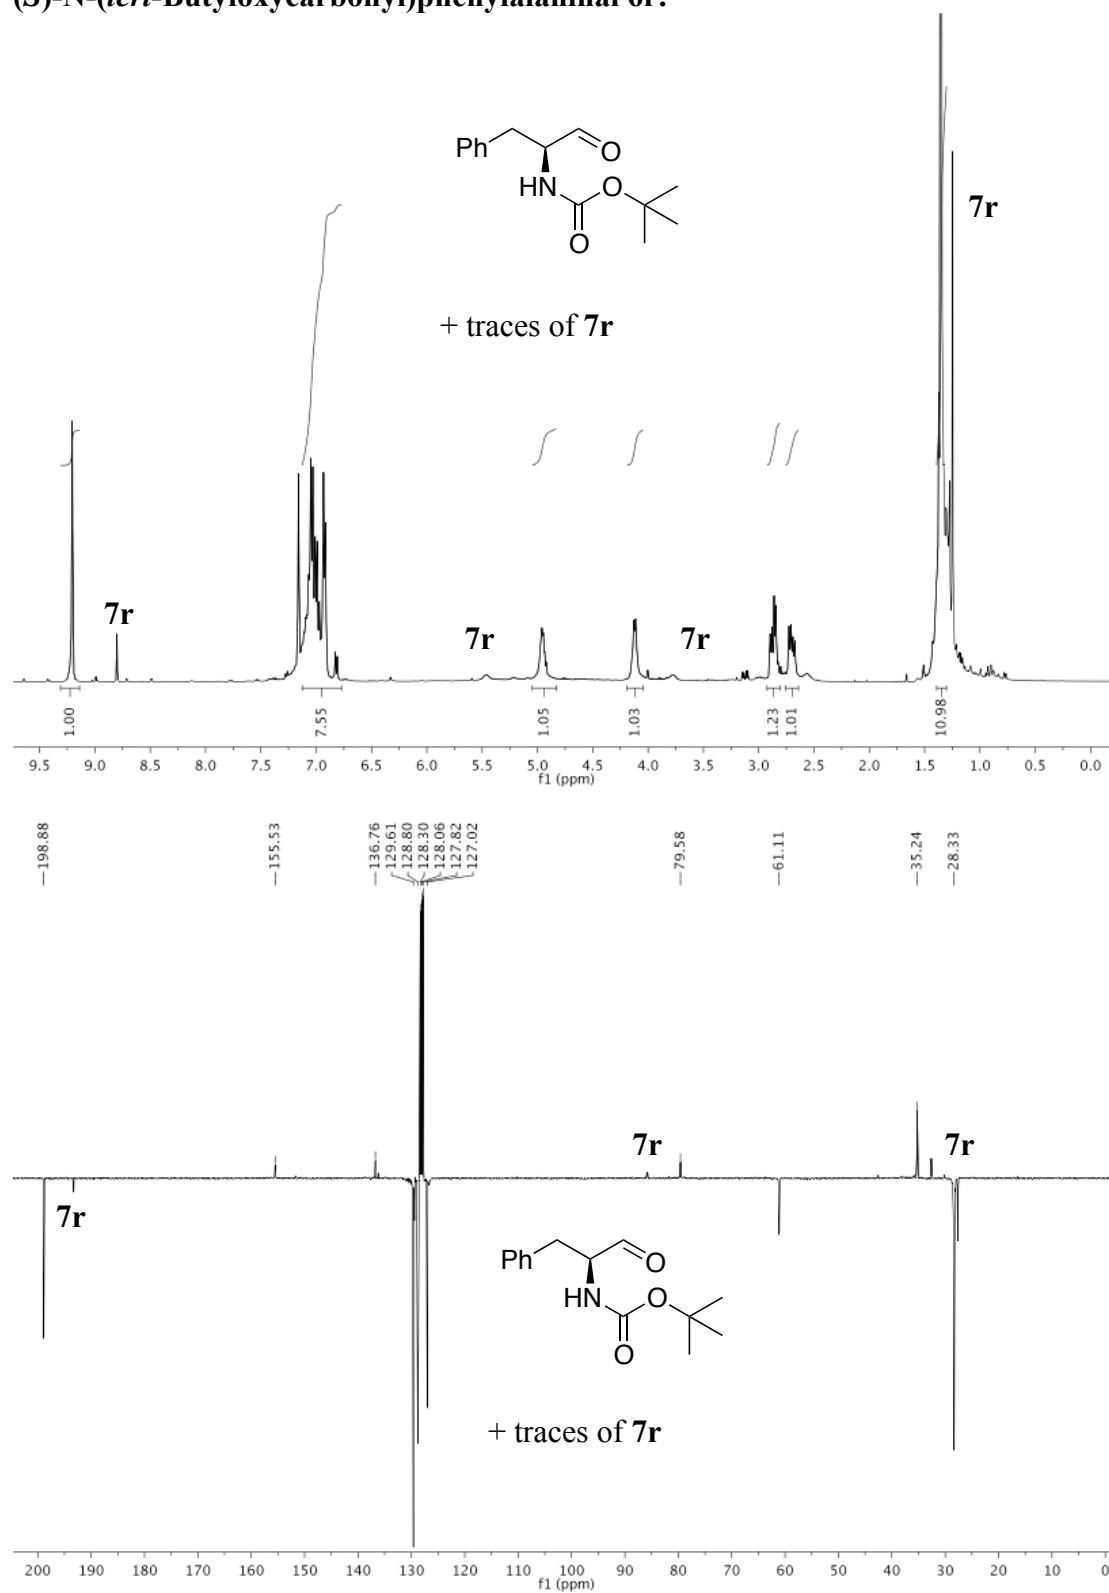

**Crude spectra of Mosher ester S3:**  
**<sup>1</sup>H NMR**

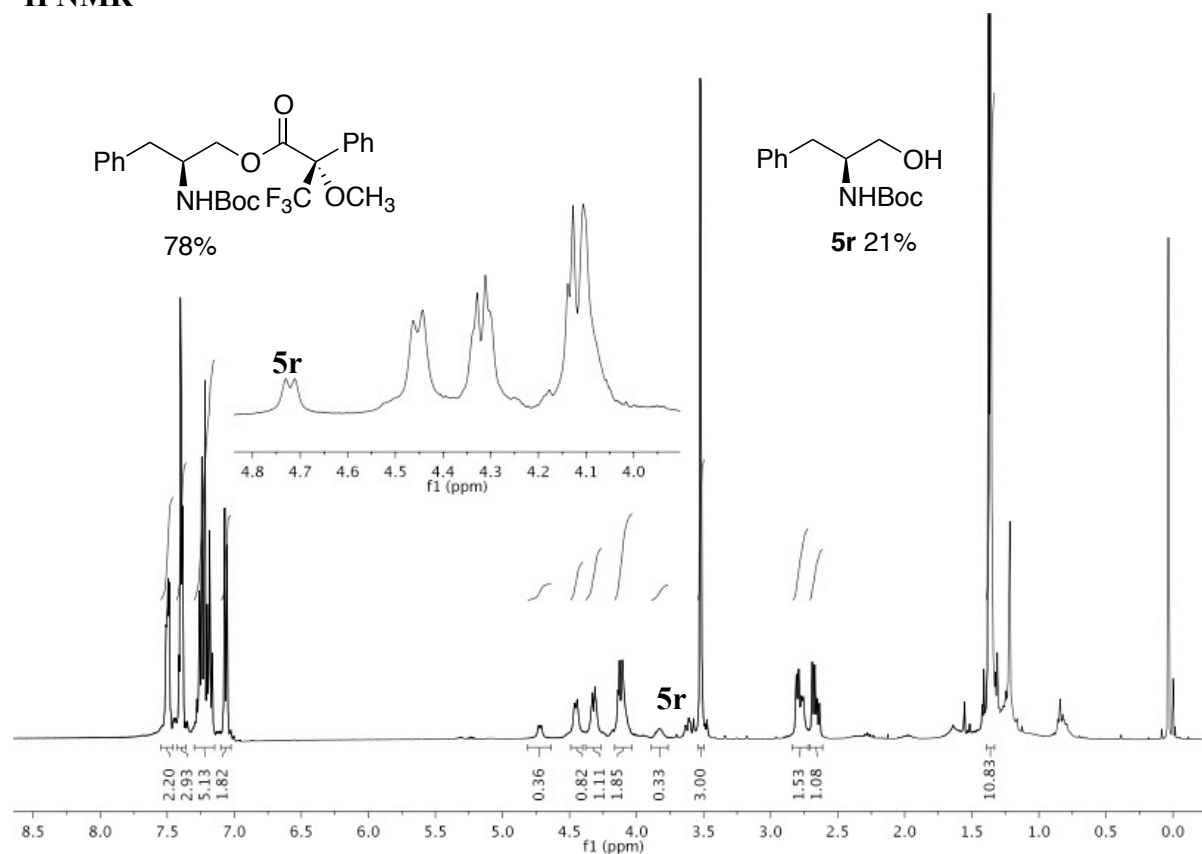

**<sup>19</sup>F NMR**

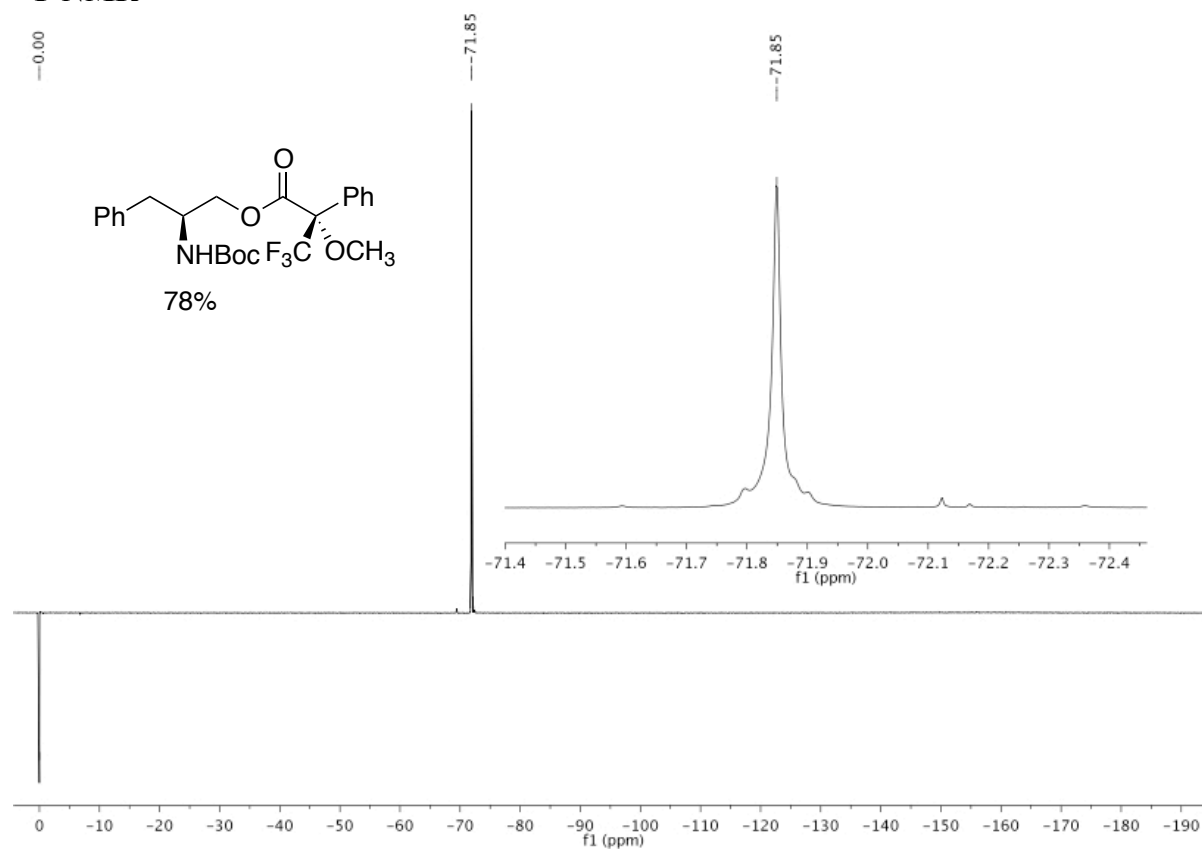

13C NMR spectrum (CDCl<sub>3</sub>) of compound **5r** and its precursor. The spectrum shows peaks from 0 to 170 ppm. Key peaks are labeled: 166.52, 155.12, 136.89, 132.29, 129.91, 129.42, 129.34, 128.80, 128.68, 127.79, 127.48, 126.96, 124.93, 122.06, 119.19, 79.92, 77.48 CDCl<sub>3</sub>, 77.16 CDCl<sub>3</sub>, 76.84 CDCl<sub>3</sub>, 66.15, 64.50, 55.61, 50.70, 37.77, 29.84, 28.48, 28.43. Chemical structures are shown for the precursor (78% yield) and **5r** (21% yield). The precursor is a chiral ester with a Boc-protected amine and a trifluoromethyl group. **5r** is a chiral alcohol with a Boc-protected amine. A peak at 30 ppm is labeled "grease".

**(S)-N-(*tert*-Butyloxycarbonyl)-N-nitrosophenylalaninal 7r:**

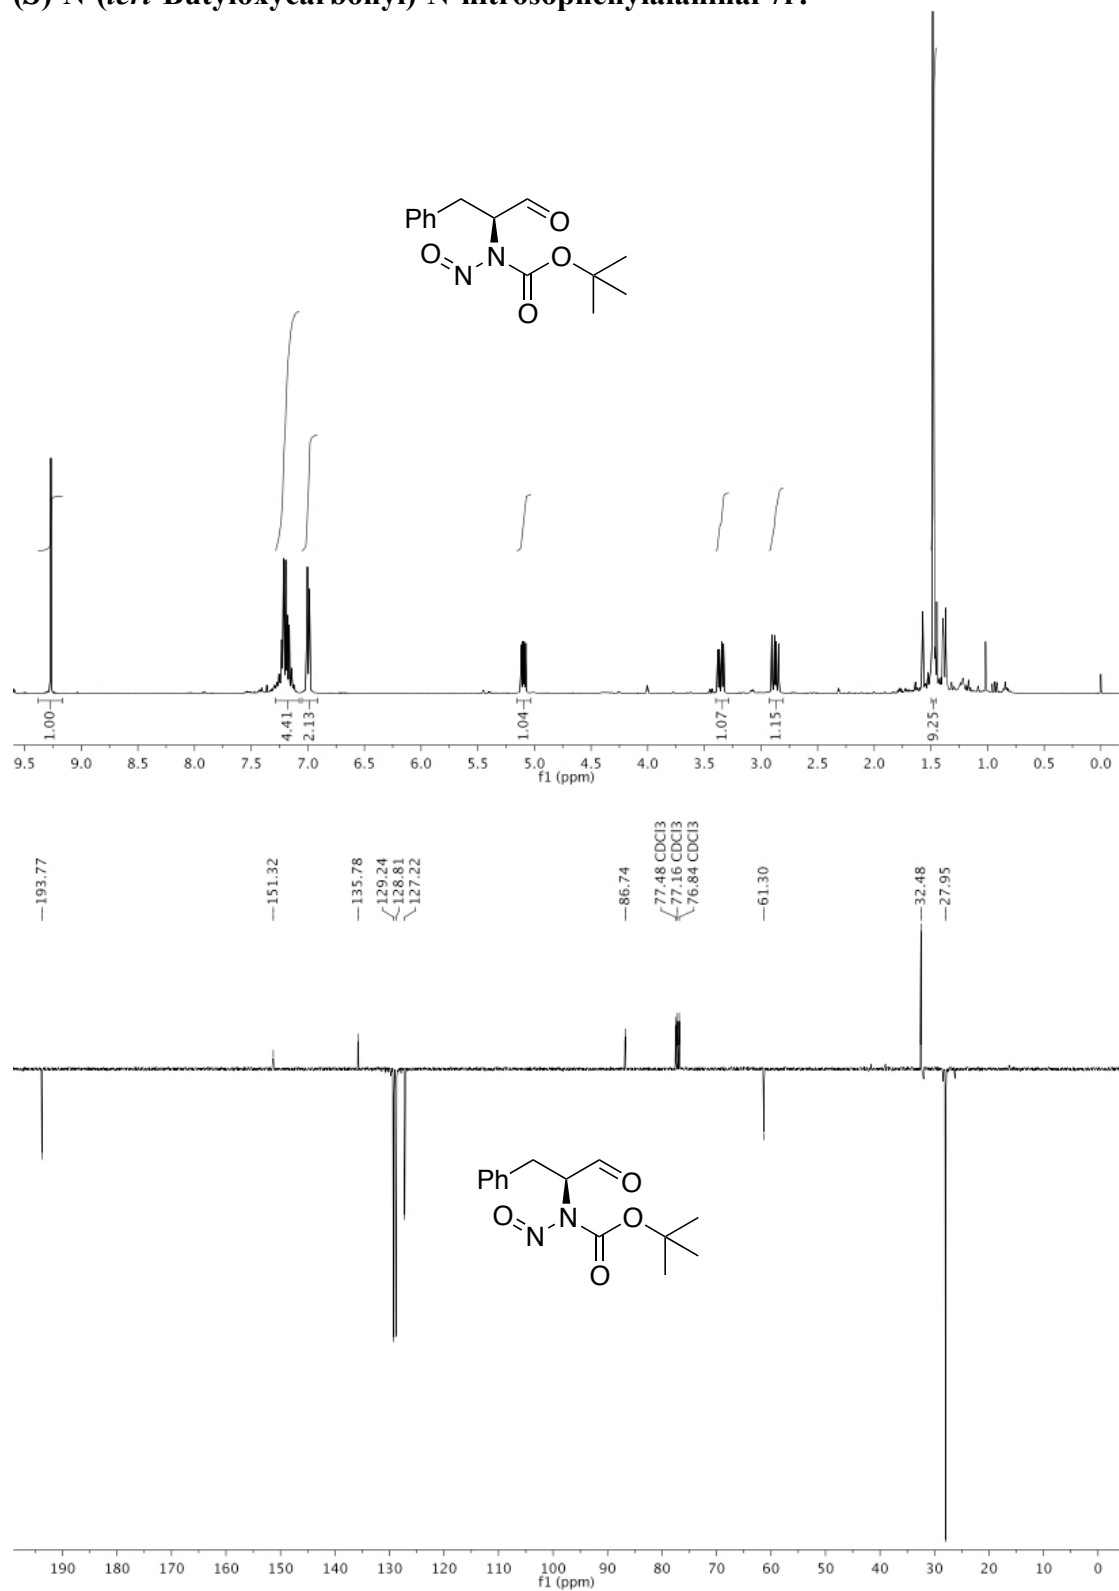

## References:

- S1 Yeom, C.-E.; Kim, Y. J.; Lee, S. Y.; Shin, Y. J.; Kim, B. M. *Tetrahedron* **2005**, *61*, 12227.
- S2 Spiniello, M.; White, J. M. *Org. Biomol. Chem.* **2003**, *1*, 3094.
- S3 Lagoutte, R.; Šebesta, P.; Jiroš, P.; Kalinová, B.; Jirošová, A.; Straka, J.; Černá, K.; Šobotník, J.; Cvačka, J.; Jahn, U. *Chem.-Eur. J.* **2013**, *19*, 8515.
- S4 Reddy, K. K. S.; Rao, B. V.; Raju, S. S. *Tetrahedron: Asymmetry* **2011**, *22*, 662.
- S5 *Spectral Database for Organic Compounds (SDBS)*; NMR spectra; SDB No.: 672; RN 100-52-7; <http://sdb.sriodb.aist.go.jp> (accessed July 19, 2013).
- S6 (a) Olah, G. A.; Ho, T.-L. *Synthesis* **1976**, 609. (b) Hamasaki, A.; Kuwada, H.; Tokunaga, M. *Tetrahedron Lett.* **2012**, *53*, 811.
- S7 *Spectral Database for Organic Compounds (SDBS)*; NMR spectra; SDB No.: 722; RN 98-86-2; <http://sdb.sriodb.aist.go.jp> (accessed July 19, 2013).
- S8 He, Y.; Liu, Q.; Ma, X.; Lu, M. *J. Chem. Res.* **2013**, *37*, 22.
- S9 *Spectral Database for Organic Compounds (SDBS)*; NMR spectra; SDB No.: 2868; RN 555-16-8; <http://sdb.sriodb.aist.go.jp> (accessed July 19, 2013).
- S10 *Spectral Database for Organic Compounds (SDBS)*; NMR spectra; SDB No.: 1293; RN 123-11-5; <http://sdb.sriodb.aist.go.jp> (accessed July 19, 2013).
- S11 Schoenberg, A.; Heck, R. F. *J. Am. Chem. Soc.* **1974**, *96*, 7761.
- S12 *Spectral Database for Organic Compounds (SDBS)*; NMR spectra; SDB No.: 2337; RN 105-07-7; <http://sdb.sriodb.aist.go.jp> (accessed September 16, 2013).
- S13 *Spectral Database for Organic Compounds (SDBS)*; NMR spectra; SDB No.: 17225; RN 14371-10-9; <http://sdb.sriodb.aist.go.jp> (accessed July 19, 2013).
- S14 Kann, N.; Rein, T.; Aakermark, B.; Helquist, P. *J. Org. Chem.* **1990**, *55*, 5312.
- S15 Kelly, C. B.; Mercadante, M. A.; Wiles, R. J.; Leadbeater, N. E. *Org. Lett.* **2013**, *15*, 2222.
- S16 *Spectral Database for Organic Compounds (SDBS)*; NMR spectra; SDB No.: 808; RN 104-53-0; <http://sdb.sriodb.aist.go.jp> (accessed July 19, 2013).
- S17 *Spectral Database for Organic Compounds (SDBS)*; NMR spectra; SDB No.: 1442; RN 2550-26-7; <http://sdb.sriodb.aist.go.jp> (accessed July 19, 2013).
- S18 Amoroso, J. W.; Borketey, L. S.; Prasad, G.; Schnarr, N. A. *Org. Lett.* **2010**, *12*, 2330.
- S19 Torii, S.; Inokuchi, T.; Sugiura, T. *J. Org. Chem.* **1986**, *51*, 155.
- S20 *Spectral Database for Organic Compounds (SDBS)*; NMR spectra; SDB No.: 843; RN 98-53-3; <http://sdb.sriodb.aist.go.jp> (accessed July 19, 2013).
- S21 *Spectral Database for Organic Compounds (SDBS)*; NMR spectra; SDB No.: 6225; RN 2320-30-1; <http://sdb.sriodb.aist.go.jp> (accessed July 19, 2013).
- S22 *Spectral Database for Organic Compounds (SDBS)*; NMR spectra; SDB No.: 6805; RN 14073-97-3; <http://sdb.sriodb.aist.go.jp> (accessed September 16, 2013).
- S23 Uenishi, J. i.; Kawahama, R.; Yonemitsu, O. *J. Org. Chem.* **1997**, *62*, 1691.
- S24 Hoffman, T. J.; Dash, J.; Rigby, J. H.; Arseniyadis, S.; Cossy, J. *Org. Lett.* **2009**, *11*, 2756.
- S25 Cooksey, J. P.; Kocienski, P. J.; Li, Y.-f.; Schunk, S.; Snaddon, T. N. *Org. Biomol. Chem.* **2006**, *4*, 3325.

- 
- S26 Esmieu, W. R.; Worden, S. M.; Catterick, D.; Wilson, C.; Hayes, C. J. *Org. Lett.* **2008**, *10*, 3045.
- S27 Dubey, A.; Kandula, S. R. V.; Kumar, P. *Synth. Commun.* **2008**, *38*, 746.
- S28 (a) *Spectral Database for Organic Compounds (SDBS)*; NMR spectra; SDB No.: 51977; RN 69610-40-8; <http://sdb.sriodb.aist.go.jp> (accessed July 24, 2013); (b) Jadhav, S. V.; Bandyopadhyay, A.; Benke, S. N.; Mali, S. M.; Gopi, H. N. *Org. Biomol. Chem.* **2011**, *9*, 4182.
- S29 Kurokawa, M.; Shindo, T.; Suzuki, M.; Nakajima, N.; Ishihara, K.; Sugai, T. *Tetrahedron: Asymmetry* **2003**, *14*, 1323.
- S30 Konradi, A. W.; Kemp, S. J.; Pedersen, S. F. *J. Am. Chem. Soc.* **1994**, *116*, 1316.
- S31 Falkiewicz, B.; Kołodziejczyk, A. S.; Liberek, B.; Wiśniewski, K. *Tetrahedron* **2001**, *57*, 7909.
- S32 Barfoot, C. W.; Harvey, J. E.; Kenworthy, M. N.; Kilburn, J. P.; Ahmed, M.; Taylor, R. J. K. *Tetrahedron* **2005**, *61*, 3403.
- S33 Kokotos, G.; Noulas, C. *J. Org. Chem.* **1996**, *61*, 6994.
